# Supplementary material
Source: PubMed Central journal article supplement (PMC6381821)

**Note to readers with disabilities:** *EHP* strives to ensure that all journal content is accessible to all readers. However, some figures and Supplemental Material published in *EHP* articles may not conform to [508 standards](#) due to the complexity of the information being presented. If you need assistance accessing journal content, please contact [ehp508@niehs.nih.gov](mailto:ehp508@niehs.nih.gov). Our staff will work with you to assess and meet your accessibility needs within 3 working days.

### **Supplemental Material**

#### **Organophosphate Pesticide Metabolite Concentrations in Urine during Pregnancy and Offspring Nonverbal IQ at Age 6 Years**

Todd A. Jusko, Michiel A. van den Dries, Anjoeka Pronk, Pamela A. Shaw, Mònica Guxens, Suzanne Spaan, Vincent W. Jaddoe, Henning Tiemeier, and Matthew P. Longnecker

#### **Table of Contents**

**Table S1.** Effect allele and single nucleotide polymorphism (SNP) descriptive statistics.

**Table S2.** Akaike information criterion (AIC) comparison between untransformed (UTF) and log<sub>10</sub> transformed DAP metabolite concentrations at <18 weeks, 18-25 weeks, and >25 weeks.

**Table S3.** Correlation coefficients for maternal and 6-year-old child urine dialkyl phosphate metabolite concentrations (n=708).

**Table S4. Fully adjusted:** Difference in child nonverbal IQ test score at age 6 years (and 95% confidence interval) per log<sub>10</sub> nmol/g creatinine increase in maternal (<18 weeks) urine dialkyl phosphate metabolite concentration by **PON1 type** (N=474).

**Table S5. Fully adjusted:** Difference in child nonverbal IQ test score at age 6 years (and 95% confidence interval) per log<sub>10</sub> nmol/g creatinine increase in maternal (18-25 weeks) urine dialkyl phosphate metabolite concentration by **PON1 type** (N=474).

**Table S6. Fully adjusted:** Difference in child nonverbal IQ test score at age 6 years (and 95% confidence interval) per log<sub>10</sub> nmol/g creatinine increase in maternal (>25 weeks) urine dialkyl phosphate metabolite concentration by **PON1 type** (N=474).

**Table S7. Fully adjusted:** Difference in child nonverbal IQ test score at age 6 years (and 95% confidence interval) per log<sub>10</sub> nmol/g creatinine increase in maternal (average pregnancy) urine dialkyl phosphate metabolite concentration by **PON1 type** (N=474).

**Table S8. Difference in child sex, maternal age, ethnicity, and educational level adjusted** child nonverbal IQ test score at age 6 years (and 95% confidence interval) per log<sub>10</sub> nmol/g creatinine increase in maternal (<18 weeks) urine dialkyl phosphate metabolite concentration by **PON1 type** (N=474).

**Table S9. Difference in child sex, maternal age, ethnicity, and educational level adjusted** child nonverbal IQ test score at age 6 years (and 95% confidence interval) per log<sub>10</sub> nmol/g creatinine increase in maternal (18-25 weeks) urine dialkyl phosphate metabolite concentration by **PON1 type** (N=474).

**Table S10. Difference in child sex, maternal age, ethnicity, and educational level adjusted** child nonverbal IQ test score at age 6 years (and 95% confidence interval) per log<sub>10</sub> nmol/g creatinine increase in maternal (>25 weeks) urine dialkyl phosphate metabolite concentration by **PON1 type** (N=474).

**Table S11. Difference in child sex, maternal age, ethnicity, and educational level adjusted** child nonverbal IQ test score at age 6 years (and 95% confidence interval) per log<sub>10</sub> nmol/g creatinine increase in maternal (average pregnancy) urine dialkyl phosphate metabolite concentration by **PON1 type** (N=474).

**Table S12. Difference in child sex, maternal age, and educational level adjusted** child nonverbal IQ test score at age 6 years (and 95% confidence interval) per log<sub>10</sub> nmol/g creatinine increase in maternal (<18 weeks) urine dialkyl phosphate metabolite concentration **in Dutch women**, by **PON1 type** (N=277).

**Table S13. Difference in maternal age, child sex, and educational level adjusted** child nonverbal IQ test score at age 6 years (and 95% confidence interval) per log<sub>10</sub> nmol/g creatinine increase in maternal (18-25 weeks) urine dialkyl phosphate metabolite concentration **in Dutch women**, by **PON1 type** (N=277).

**Table S14. Difference in child sex, maternal age, and educational level adjusted** child nonverbal IQ test score at age 6 years (and 95% confidence interval) per log<sub>10</sub> nmol/g creatinine increase in maternal (>25 weeks) urine dialkyl phosphate metabolite concentration **in Dutch women**, by **PON1 type** (N=277).

**Table S15. Difference in child sex, maternal age, and educational level adjusted** child nonverbal IQ test score at age 6 years (and 95% confidence interval) per log<sub>10</sub> nmol/g creatinine increase in maternal (average pregnancy) urine dialkyl phosphate metabolite concentration **in Dutch women**, by **PON1 type** (N=277).

**Table S16. Concentrations <LOD substituted with LOD/√2:** Difference in child nonverbal IQ test score at age 6 years (and 95% confidence interval) per log<sub>10</sub> nmol/g creatinine increase in maternal urine dialkyl phosphate metabolite concentration, by timing of pregnancy urine sampling and degree of adjustment (N=708).

**Table S17. Creatinine adjustment as separate covariate:** Difference in child nonverbal IQ test score at age 6 years (and 95% confidence interval) per log<sub>10</sub> nmol/g creatinine increase in maternal urine dialkyl phosphate metabolite concentration, by timing of pregnancy urine sampling and degree of adjustment (N=708).

**Table S18. Removal of extreme values:** Difference in child nonverbal IQ test score at age 6 years (and 95% confidence interval) per log<sub>10</sub> nmol/g creatinine increase in maternal urine dialkyl phosphate metabolite concentration, by timing of pregnancy urine sampling and degree of adjustment.

**Table S19. Adjustment for prenatal fruit and vegetable consumption:** Difference in child nonverbal IQ test score at age 6 years (and 95% confidence interval) per log<sub>10</sub> nmol/g creatinine increase in maternal urine dialkyl phosphate metabolite concentration, by timing of pregnancy urine sampling and degree of adjustment (N=708).

**Table S20. Multiple informants model:** Difference in child nonverbal IQ test score at age 6 years (and 95% confidence interval) per log<sub>10</sub> nmol/g creatinine increase in maternal urine dialkyl phosphate metabolite concentration, by timing of pregnancy urine sampling (N=708).

**Table S21. Effect measure modification by maternal education:** Difference in child nonverbal IQ test score at age 6 years (and 95% confidence interval) per log<sub>10</sub> nmol/g creatinine increase in maternal urine dialkyl phosphate metabolite concentration, by timing of pregnancy urine sampling, degree of adjustment, and **maternal education level** (N=708).

**Table S22. Effect measure modification by child sex:** Difference in child nonverbal IQ test score at age 6 years (and 95% confidence interval) per log<sub>10</sub> nmol/g creatinine increase in maternal urine dialkyl phosphate metabolite concentration, by timing of pregnancy urine sampling, degree of adjustment, and **child sex** (N=708).

**Table S23. Complete-case only model (with the exclusion of IT-Home score):** Difference in child nonverbal IQ test score at age 6 years (and 95% confidence interval) per log<sub>10</sub> nmol/g creatinine increase in maternal urine dialkyl phosphate metabolite concentration, by timing of pregnancy urine sampling, and degree of adjustment, among mother-child pairs with complete covariate data.

**Table S24. Complete-case only model (with the inclusion of IT-Home score):** Difference in child nonverbal IQ test score at age 6 years (and 95% confidence interval) per log<sub>10</sub> nmol/g creatinine increase in maternal urine dialkyl phosphate metabolite concentration, by timing of pregnancy urine sampling, and degree of adjustment, among mother-child pairs with complete covariate data.

**Table S25. Excluding DEDTP (i.e., including only those metabolites with at least 80% of values >LOD):** Difference in child nonverbal IQ test score at age 6 years (and 95% confidence interval) per log<sub>10</sub> nmol/g creatinine increase in maternal urine dialkyl phosphate metabolite concentration, by timing of pregnancy urine sampling and degree of adjustment (N=708).

**Table S26.** Difference in **Mosaics** test score at age 6 years (and 95% confidence interval) per log<sub>10</sub> nmol/g creatinine increase in maternal urine dialkyl phosphate metabolite concentration, by timing of pregnancy urine sampling and degree of adjustment (N=708).

**Table S27.** Difference in **Categories** test score at age 6 years (and 95% confidence interval) per log<sub>10</sub> nmol/g creatinine increase in maternal urine dialkyl phosphate metabolite concentration, by timing of pregnancy urine sampling and degree of adjustment (N=708).

**Figure S1. Restricted cubic spline (and 95% confidence interval) of adjusted child nonverbal IQ scores and (untransformed) total dialkyl phosphate concentrations, by timing of pregnancy urine sampling (n=708).** Adjusted for child sex, maternal age, ethnicity (Dutch, other-western, and non-western), education (low, intermediate, and high), income (low, middle, and high), marital status, maternal alcohol consumption (no alcohol consumption during pregnancy, alcohol consumption until pregnancy was known, occasional alcohol consumption during pregnancy, and frequent alcohol consumption during pregnancy), maternal non-verbal IQ, BMI categories (<18.5, 18.5-25, 25-30, and 30+), height of the mother, parity categories (0, 1, and 2+), IT-Home quartiles, and smoking categories (no smoking during pregnancy, smoked until pregnancy was known, and smoked during pregnancy).

**Figure S2. Restricted cubic spline (and 95% confidence interval) of adjusted child nonverbal IQ scores and (untransformed) diethyl alkyl phosphate concentrations, by timing of pregnancy urine sampling (n=708).** Adjusted for child sex, maternal age, ethnicity (Dutch, other-western and non-western), education (low, intermediate, and high), income (low, middle, and high), marital status, maternal alcohol consumption (no alcohol consumption during pregnancy, alcohol consumption until pregnancy was known, occasional alcohol consumption during pregnancy, and frequent alcohol consumption during pregnancy), maternal non-verbal IQ, BMI categories (<18.5, 18.5-25, 25-30, and 30+), height of the mother, parity categories (0, 1, and 2+), IT-Home quartiles, and smoking categories (no smoking during pregnancy, smoked until pregnancy was known, and smoked during pregnancy).

**Figure S3. Restricted cubic spline (and 95% confidence interval) of adjusted child nonverbal IQ scores and (untransformed) dimethyl alkyl phosphate concentrations, by timing of pregnancy urine sampling (n=708).** Adjusted for child sex, maternal age, ethnicity (Dutch, other-western and non-western), education (low, intermediate, and high), income (low, middle, and high), marital status, maternal alcohol consumption (no alcohol consumption during pregnancy, alcohol consumption until pregnancy was known, occasional alcohol consumption during pregnancy, and frequent alcohol consumption during pregnancy), maternal non-verbal IQ, BMI categories (<18.5, 18.5-25, 25-30, and 30+), height of the mother, parity categories (0, 1, and 2+), IT-Home quartiles, and smoking categories (no smoking during pregnancy, smoked until pregnancy was known, and smoked during pregnancy).

**Table S1.** Effect allele and single nucleotide polymorphism (SNP) descriptive statistics.

| <b>PON1</b>       | <b>SNP</b> | <b>Al1</b> | <b>Al2</b> | <b>Freq1</b> | <b>MAF</b> | <b>Quality</b> | <b>R<sup>2</sup></b> |
|-------------------|------------|------------|------------|--------------|------------|----------------|----------------------|
| <b>PON1-Q192</b>  | rs662      | C          | T          | 0.35474      | 0.35474    | 0.99993        | 0.99989              |
| <b>PON1-108</b>   | rs705379   | G          | A          | 0.56718      | 0.43282    | 0.98614        | 0.95791              |
| <b>PON1-161</b>   | rs705381   | C          | T          | 0.74361      | 0.25639    | 0.99570        | 0.98359              |
| <b>PON1- L55M</b> | rs854560   | A          | T          | 0.67882      | 0.32118    | 0.99974        | 0.99903              |
| <b>PON1-909</b>   | rs854572   | C          | G          | 0.52449      | 0.47551    | 0.99881        | 0.99633              |

*Note: rs662 was directly genotyped. rs705379, rs705381, rs854560 and rs854572 are based on imputed genotypes.*

**Table S2.** Akaike information criterion (AIC) comparison between untransformed (UTF) and log<sub>10</sub> transformed DAP metabolite concentrations at <18 weeks, 18-25 weeks, and >25 weeks.

|                 | UTF<br><18<br>weeks | Log <sub>10</sub><br><18<br>weeks | UTF<br>18-25<br>weeks | Log <sub>10</sub><br>18-25<br>weeks | UTF<br>>25<br>weeks | Log <sub>10</sub><br>>25<br>weeks | Mean<br>UTF<br>DAP | Mean<br>Log <sub>10</sub><br>DAP | Mutually<br>Adjusted<br>UTF DAP | Mutually<br>Adjusted<br>Log <sub>10</sub> DAP |
|-----------------|---------------------|-----------------------------------|-----------------------|-------------------------------------|---------------------|-----------------------------------|--------------------|----------------------------------|---------------------------------|-----------------------------------------------|
| Imputation set  |                     |                                   |                       |                                     |                     |                                   |                    |                                  |                                 |                                               |
| 1               | 5825.958            | 5825.072                          | 5825.344              | 5826.025                            | 5823.157            | 5821.785                          | 5825.786           | 5825.331                         | 5825.071                        | 5823.574                                      |
| 2               | 5826.598            | 5825.442                          | 5825.925              | 5826.666                            | 5823.462            | 5821.939                          | 5826.434           | 5826.020                         | 5824.826                        | 5822.834                                      |
| 3               | 5826.639            | 5826.015                          | 5826.090              | 5826.748                            | 5823.600            | 5822.573                          | 5826.412           | 5826.123                         | 5825.320                        | 5824.369                                      |
| 4               | 5827.486            | 5827.284                          | 5827.329              | 5828.101                            | 5825.006            | 5823.170                          | 5827.350           | 5827.205                         | 5826.170                        | 5824.875                                      |
| 5               | 5824.194            | 5823.400                          | 5823.744              | 5824.393                            | 5822.113            | 5820.892                          | 5824.175           | 5823.845                         | 5823.871                        | 5822.498                                      |
| 6               | 5828.589            | 5827.536                          | 5828.423              | 5829.002                            | 5826.163            | 5824.449                          | 5828.470           | 5828.001                         | 5827.932                        | 5825.837                                      |
| 7               | 5825.592            | 5824.710                          | 5825.191              | 5825.782                            | 5823.032            | 5821.161                          | 5825.425           | 5824.928                         | 5825.028                        | 5822.869                                      |
| 8               | 5824.786            | 5823.832                          | 5823.945              | 5824.831                            | 5821.791            | 5820.049                          | 5824.652           | 5824.162                         | 5823.267                        | 5821.500                                      |
| 9               | 5826.308            | 5825.438                          | 5825.829              | 5826.475                            | 5823.164            | 5821.843                          | 5826.078           | 5825.800                         | 5824.742                        | 5823.239                                      |
| 10              | 5826.741            | 5825.873                          | 5826.505              | 5826.959                            | 5823.316            | 5821.546                          | 5826.308           | 5825.769                         | 5825.646                        | 5823.532                                      |
| <b>Mean AIC</b> | <b>5826.289</b>     | <b>5825.46</b>                    | <b>5825.833</b>       | <b>5826.498</b>                     | <b>5823.48</b>      | <b>5821.941</b>                   | <b>5826.109</b>    | <b>5825.718</b>                  | <b>5825.187</b>                 | <b>5823.513</b>                               |

**Table S3.** Correlation coefficients for maternal and 6-year-old child urine dialkyl phosphate metabolite concentrations (n=708).

| <b>Spearman's rho correlations coefficients</b> | <b>&lt; 18 weeks gestation</b> | <b>18 – 25 weeks gestation</b> | <b>&gt; 25 weeks gestation</b> | <b>Child at age 6</b> |
|-------------------------------------------------|--------------------------------|--------------------------------|--------------------------------|-----------------------|
| <b>Dialkyl phosphates (total)</b>               |                                |                                |                                |                       |
| < 18 weeks' gestation                           | 1                              |                                |                                |                       |
| 18 – 25 weeks' gestation                        | 0.22**                         | 1                              |                                |                       |
| > 25 weeks' gestation                           | 0.17**                         | 0.31**                         | 1                              |                       |
| child at age 6                                  | 0.05                           | 0.03                           | 0.04                           | 1                     |
| <b>Diethyl alkyl phosphates</b>                 |                                |                                |                                |                       |
| < 18 weeks' gestation                           | 1                              |                                |                                |                       |
| 18 – 25 weeks' gestation                        | 0.29**                         | 1                              |                                |                       |
| > 25 weeks' gestation                           | 0.18**                         | 0.28**                         | 1                              |                       |
| child at age 6                                  | 0.07                           | 0.01                           | 0.07                           | 1                     |
| <b>Dimethyl alkyl phosphates</b>                |                                |                                |                                |                       |
| < 18 weeks' gestation                           | 1                              |                                |                                |                       |
| 18 – 25 weeks' gestation                        | 0.19**                         | 1                              |                                |                       |
| > 25 weeks' gestation                           | 0.15**                         | 0.30**                         | 1                              |                       |
| child at age 6                                  | 0.02                           | 0.03                           | 0.02                           | 1                     |
| <b>Pearson correlation coefficients (log10)</b> |                                |                                |                                |                       |
| <b>Dialkyl phosphates (total)</b>               |                                |                                |                                |                       |
| < 18 weeks' gestation                           | 1                              |                                |                                |                       |
| 18 – 25 weeks' gestation                        | 0.24**                         | 1                              |                                |                       |
| > 25 weeks' gestation                           | 0.18**                         | 0.32**                         | 1                              |                       |
| child at age 6                                  | -0.01                          | 0.01                           | -0.01                          | 1                     |
| <b>Diethyl alkyl phosphates</b>                 |                                |                                |                                |                       |
| < 18 weeks' gestation                           | 1                              |                                |                                |                       |
| 18 – 25 weeks' gestation                        | 0.22**                         | 1                              |                                |                       |
| > 25 weeks' gestation                           | 0.12**                         | 0.23**                         | 1                              |                       |
| child at age 6                                  | 0.01                           | -0.03                          | 0.04                           | 1                     |
| <b>Dimethyl alkyl phosphates</b>                |                                |                                |                                |                       |
| < 18 weeks' gestation                           | 1                              |                                |                                |                       |
| 18 – 25 weeks' gestation                        | 0.20**                         | 1                              |                                |                       |
| > 25 weeks' gestation                           | 0.16**                         | 0.31**                         | 1                              |                       |
| child at age 6                                  | -0.02                          | 0.02                           | -0.01                          | 1                     |

\*P<0.05 \*\* P<0.01

**Table S4. Fully adjusted:** Difference in child nonverbal IQ test score at age 6 years (and 95% confidence interval) per log10 nmol/g creatinine increase in maternal (<18 weeks) urine dialkyl phosphate metabolite concentration by **PON1 type** (N=474).

|          |                            | N   | Adjusted models <sup>a</sup>            |          |    |                                       |          |       |                                        |          |      |       |    |       |
|----------|----------------------------|-----|-----------------------------------------|----------|----|---------------------------------------|----------|-------|----------------------------------------|----------|------|-------|----|-------|
|          |                            |     | Dialkyl phosphates (total) <sup>b</sup> |          |    | Diethyl alkyl phosphates <sup>c</sup> |          |       | Dimethyl alkyl phosphates <sup>d</sup> |          |      |       |    |       |
|          |                            |     | $\beta$                                 | (95% CI) |    | $\beta$                               | (95% CI) |       | $\beta$                                | (95% CI) |      |       |    |       |
| PON1Q192 |                            |     |                                         |          |    |                                       |          |       |                                        |          |      |       |    |       |
|          | QQ (TT)                    | 226 | 1.3                                     | -4.9     | to | 7.4                                   | 4.2      | -1.0  | to                                     | 9.4      | -0.1 | -6.0  | to | 5.8   |
|          | QR (CT)                    | 202 | -3.2                                    | -9.7     | to | 3.4                                   | -3.7     | -7.7  | to                                     | 0.3      | -3.3 | -9.6  | to | 3.0   |
|          | RR (CC) <sup>e</sup>       | 46  | -4.7                                    | -29.6    | to | 20.3                                  | 5.0      | -12.7 | to                                     | 22.6     | -6.6 | -30.0 | to | 16.7  |
|          | P interaction <sup>f</sup> |     |                                         |          |    | 0.292                                 |          |       |                                        | 0.042    |      |       |    | 0.437 |
| PON1L55  |                            |     |                                         |          |    |                                       |          |       |                                        |          |      |       |    |       |
|          | TT                         | 65  | -1.0                                    | -15.5    | to | 13.6                                  | -0.5     | -11.1 | to                                     | 10.2     | -0.7 | -14.7 | to | 13.3  |
|          | AT                         | 198 | -4.7                                    | -12.1    | to | 2.8                                   | -1.3     | -15.1 | to                                     | 4.4      | -5.2 | -15.1 | to | 1.8   |
|          | AA                         | 211 | 0.2                                     | -6.1     | to | 6.5                                   | -2.1     | -6.0  | to                                     | 1.7      | -0.4 | -6.4  | to | 5.7   |
|          | P interaction <sup>f</sup> |     |                                         |          |    | 0.968                                 |          |       |                                        | 0.402    |      |       |    | 0.982 |
| PON1-108 |                            |     |                                         |          |    |                                       |          |       |                                        |          |      |       |    |       |
|          | TT                         | 90  | -3.7                                    | -14.8    | to | 7.4                                   | 1.1      | -6.5  | to                                     | 8.7      | -5.5 | -16.2 | to | 5.1   |
|          | CT                         | 232 | 2.0                                     | -4.6     | to | 8.7                                   | 3.3      | -2.6  | to                                     | 9.3      | 1.3  | -5.0  | to | 7.6   |
|          | CC                         | 152 | -2.1                                    | -9.9     | to | 5.7                                   | -3.3     | -7.6  | to                                     | 1.1      | -2.3 | -9.7  | to | 5.1   |
|          | P interaction <sup>f</sup> |     |                                         |          |    | 0.722                                 |          |       |                                        | 0.175    |      |       |    | 0.995 |
| PON1-909 |                            |     |                                         |          |    |                                       |          |       |                                        |          |      |       |    |       |
|          | GG                         | 107 | -4.8                                    | -15.1    | to | 5.5                                   | -0.3     | -7.2  | to                                     | 6.7      | -6.0 | -15.9 | to | 3.9   |
|          | CG                         | 229 | 1.8                                     | -4.8     | to | 8.4                                   | 2.3      | -3.6  | to                                     | 8.3      | 1.3  | -4.9  | to | 7.6   |
|          | CC                         | 138 | -2.5                                    | -11.2    | to | 6.1                                   | -2.9     | -7.4  | to                                     | 1.7      | -3.2 | -11.5 | to | 5.0   |
|          | P interaction <sup>f</sup> |     |                                         |          |    | 0.677                                 |          |       |                                        | 0.254    |      |       |    | 0.870 |
| PON1-161 |                            |     |                                         |          |    |                                       |          |       |                                        |          |      |       |    |       |
|          | GG <sup>e</sup>            | 37  | 8.4                                     | -13.2    | to | 30.1                                  | 12.3     | -6.0  | to                                     | 30.7     | 6.5  | -13.7 | to | 26.8  |
|          | CG                         | 172 | -2.9                                    | -9.7     | to | 3.9                                   | -0.3     | -6.2  | to                                     | 5.7      | -3.1 | -9.6  | to | 3.5   |
|          | CC                         | 265 | -1.9                                    | -8.1     | to | 4.2                                   | -2.3     | -5.9  | to                                     | 1.4      | -2.8 | -8.7  | to | 3.1   |
|          | P interaction <sup>f</sup> |     |                                         |          |    | 0.599                                 |          |       |                                        | 0.152    |      |       |    | 0.458 |

a. Adjusted for child sex, maternal age, ethnicity (Dutch, other-western and non-western), education (low, intermediate, and high), income (low, middle, and high), marital status, maternal alcohol consumption (no alcohol consumption during pregnancy, alcohol consumption until pregnancy was known, occasional alcohol consumption during pregnancy, and frequent alcohol consumption during pregnancy), maternal non-verbal IQ, BMI categories (<18.5, 18.5-25, 25-30, and 30+), height of the mother, parity categories (0, 1, and 2+), Home IT quartiles, and smoking categories (no smoking during pregnancy, smoked until pregnancy was known, and smoked during pregnancy).

b. Total dialkyl phosphates is the sum of DEDTP, DETP, DEP, DMDTP, DMTP and DMP.

c. Diethyl alkyl phosphates is the sum of DEDTP, DETP and DEP.

d. Dimethyl alkyl phosphates is the sum of DMDTP, DMTP and DMP.

e. BMI included as a continuous variable for PON1Q192 and PON1-161 because of missing levels in BMI for RR and GG.

f. P-value based on interaction where the PON-1 type was treated as an ordinal variable.



**Table S5. Fully adjusted:** Difference in child nonverbal IQ test score at age 6 years (and 95% confidence interval) per log<sub>10</sub> nmol/g creatinine increase in maternal (**18-25 weeks**) urine dialkyl phosphate metabolite concentration by **PON1 type** (N=474).

|          |                            | N   | Adjusted models <sup>a</sup>            |          |       |                                       |          |       |                                        |          |      |       |    |       |
|----------|----------------------------|-----|-----------------------------------------|----------|-------|---------------------------------------|----------|-------|----------------------------------------|----------|------|-------|----|-------|
|          |                            |     | Dialkyl phosphates (total) <sup>b</sup> |          |       | Diethyl alkyl phosphates <sup>c</sup> |          |       | Dimethyl alkyl phosphates <sup>d</sup> |          |      |       |    |       |
|          |                            |     | $\beta$                                 | (95% CI) |       | $\beta$                               | (95% CI) |       | $\beta$                                | (95% CI) |      |       |    |       |
| PON1Q192 |                            |     |                                         |          |       |                                       |          |       |                                        |          |      |       |    |       |
|          | QQ (TT)                    | 226 | 2.6                                     | -4.2     | to    | 9.4                                   | 1.7      | -3.1  | to                                     | 6.5      | 2.3  | -4.4  | to | 9.0   |
|          | QR (CT)                    | 202 | 3.7                                     | -4.2     | to    | 11.6                                  | 2.5      | -1.7  | to                                     | 6.7      | 2.7  | -4.7  | to | 10.0  |
|          | RR (CC) <sup>e</sup>       | 46  | 1.1                                     | -24.3    | to    | 26.6                                  | 3.0      | -17.6 | to                                     | 23.6     | -1.0 | -24.9 | to | 22.9  |
|          | P interaction <sup>f</sup> |     |                                         |          | 0.724 |                                       |          |       | 0.910                                  |          |      |       |    | 0.543 |
| PON1L55  |                            |     |                                         |          |       |                                       |          |       |                                        |          |      |       |    |       |
|          | TT                         | 65  | 8.1                                     | -5.6     | to    | 21.8                                  | 8.2      | -3.2  | to                                     | 19.6     | 7.0  | -6.7  | to | 20.8  |
|          | AT                         | 198 | 1.2                                     | -6.4     | to    | 8.9                                   | -0.9     | -7.9  | to                                     | 5.0      | 1.6  | -7.9  | to | 9.0   |
|          | AA                         | 211 | 1.5                                     | -6.0     | to    | 9.1                                   | 3.0      | -0.8  | to                                     | 6.8      | -0.7 | -7.8  | to | 6.5   |
|          | P interaction <sup>f</sup> |     |                                         |          | 0.604 |                                       |          |       | 0.872                                  |          |      |       |    | 0.381 |
| PON1-108 |                            |     |                                         |          |       |                                       |          |       |                                        |          |      |       |    |       |
|          | TT                         | 90  | 7.1                                     | -6.4     | to    | 20.7                                  | 6.3      | -4.3  | to                                     | 16.9     | 5.3  | -7.4  | to | 18.1  |
|          | CT                         | 232 | 0.2                                     | -7.0     | to    | 7.4                                   | 0.0      | -4.0  | to                                     | 4.0      | 0.2  | -6.8  | to | 7.1   |
|          | CC                         | 152 | 1.8                                     | -6.7     | to    | 10.3                                  | 4.8      | -1.2  | to                                     | 10.8     | -0.1 | -8.3  | to | 8.1   |
|          | P interaction <sup>f</sup> |     |                                         |          | 0.232 |                                       |          |       | 0.951                                  |          |      |       |    | 0.175 |
| PON1-909 |                            |     |                                         |          |       |                                       |          |       |                                        |          |      |       |    |       |
|          | GG                         | 107 | 3.9                                     | -7.9     | to    | 15.8                                  | 4.1      | -4.9  | to                                     | 13.1     | 2.7  | -8.5  | to | 13.9  |
|          | CG                         | 229 | 1.2                                     | -6.0     | to    | 8.5                                   | 0.2      | -3.8  | to                                     | 4.2      | 1.3  | -5.7  | to | 8.3   |
|          | CC                         | 138 | 2.8                                     | -6.3     | to    | 11.9                                  | 5.0      | -1.4  | to                                     | 11.4     | 0.6  | -8.2  | to | 9.4   |
|          | P interaction <sup>f</sup> |     |                                         |          | 0.414 |                                       |          |       | 0.808                                  |          |      |       |    | 0.317 |
| PON1-161 |                            |     |                                         |          |       |                                       |          |       |                                        |          |      |       |    |       |
|          | GG <sup>e</sup>            | 37  | 6.0                                     | -28.5    | to    | 40.4                                  | -0.1     | -16.3 | to                                     | 16.1     | 5.0  | -29.0 | to | 38.9  |
|          | CG                         | 172 | -1.5                                    | -9.6     | to    | 6.6                                   | 1.4      | -2.7  | to                                     | 5.5      | -1.8 | -9.4  | to | 5.7   |
|          | CC                         | 265 | 4.4                                     | -2.3     | to    | 11.1                                  | 3.4      | -1.5  | to                                     | 8.4      | 3.3  | -3.2  | to | 9.8   |
|          | P interaction <sup>f</sup> |     |                                         |          | 0.808 |                                       |          |       | 0.920                                  |          |      |       |    | 0.822 |

a. Adjusted for child sex, maternal age, ethnicity (Dutch, other-western and non-western), education (low, intermediate, and high), income (low, middle, and high), marital status, maternal alcohol consumption (no alcohol consumption during pregnancy, alcohol consumption until pregnancy was known, occasional alcohol consumption during pregnancy, and frequent alcohol consumption during pregnancy), maternal non-verbal IQ, BMI categories (<18.5, 18.5-25, 25-30, and 30+), height of the mother, parity categories (0, 1, and 2+), Home IT quartiles, and smoking categories (no smoking during pregnancy, smoked until pregnancy was known, and smoked during pregnancy).

b. Total dialkyl phosphates is the sum of DEDTP, DETP, DEP, DMDTP, DMTP and DMP.

c. Diethyl alkyl phosphates is the sum of DEDTP, DETP and DEP.

d. Dimethyl alkyl phosphates is the sum of DMDTP, DMTP and DMP

e. BMI included as a continuous variable for PON1Q192 and PON1-161 because of missing levels in BMI for RR and GG.

f. P-value based on interaction where the PON-1 type was treated as an ordinal variable.

**Table S6. Fully adjusted:** Difference in child nonverbal IQ test score at age 6 years (and 95% confidence interval) per log<sub>10</sub> nmol/g creatinine increase in maternal (>25 weeks) urine dialkyl phosphate metabolite concentration by **PON1 type** (N=474).

|                            | N   | Adjusted models <sup>a</sup>            |          |    |       |                                       |       |    |                                        |      |       |    |       |
|----------------------------|-----|-----------------------------------------|----------|----|-------|---------------------------------------|-------|----|----------------------------------------|------|-------|----|-------|
|                            |     | Dialkyl phosphates (total) <sup>b</sup> |          |    |       | Diethyl alkyl phosphates <sup>c</sup> |       |    | Dimethyl alkyl phosphates <sup>d</sup> |      |       |    |       |
|                            |     | β                                       | (95% CI) |    | β     | (95% CI)                              |       | β  | (95% CI)                               |      |       |    |       |
| <b>PON1Q192</b>            |     |                                         |          |    |       |                                       |       |    |                                        |      |       |    |       |
| QQ (TT)                    | 226 | -6.6                                    | -13.4    | to | 0.1   | -0.8                                  | -6.0  | to | 4.4                                    | -6.7 | -13.2 | to | -0.1  |
| QR (CT)                    | 202 | 3.2                                     | -4.1     | to | 10.5  | 2.8                                   | -3.6  | to | 9.1                                    | 2.6  | -4.2  | to | 9.4   |
| RR (CC) <sup>e</sup>       | 46  | -7.2                                    | -28.1    | to | 13.8  | -1.3                                  | -16.7 | to | 14.1                                   | -9.2 | -31.5 | to | 13.1  |
| P interaction <sup>f</sup> |     |                                         |          |    | 0.749 |                                       |       |    | 0.927                                  |      |       |    | 0.815 |
| <b>PON1L55</b>             |     |                                         |          |    |       |                                       |       |    |                                        |      |       |    |       |
| TT                         | 65  | -2.9                                    | -17.0    | to | 11.3  | -3.6                                  | -16.1 | to | 9.0                                    | -1.9 | -14.7 | to | 11.0  |
| AT                         | 198 | -5.6                                    | -13.7    | to | 2.4   | 1.6                                   | -17.8 | to | 8.1                                    | -6.0 | -17.8 | to | 1.6   |
| AA                         | 211 | 0.1                                     | -6.2     | to | 6.5   | -1.1                                  | -6.3  | to | 4.0                                    | 0.2  | -5.9  | to | 6.4   |
| P interaction <sup>f</sup> |     |                                         |          |    | 0.383 |                                       |       |    | 0.904                                  |      |       |    | 0.448 |
| <b>PON1-108</b>            |     |                                         |          |    |       |                                       |       |    |                                        |      |       |    |       |
| TT                         | 90  | -5.2                                    | -19.2    | to | 8.7   | 5.1                                   | -6.9  | to | 17.1                                   | -5.9 | -18.6 | to | 6.7   |
| CT                         | 232 | -0.1                                    | -7.2     | to | 7.0   | -0.2                                  | -5.7  | to | 5.3                                    | -0.4 | -7.1  | to | 6.4   |
| CC                         | 152 | -2.6                                    | -9.8     | to | 4.6   | -0.5                                  | -6.6  | to | 5.5                                    | -2.4 | -9.3  | to | 4.6   |
| P interaction <sup>f</sup> |     |                                         |          |    | 0.757 |                                       |       |    | 0.860                                  |      |       |    | 0.656 |
| <b>PON1-909</b>            |     |                                         |          |    |       |                                       |       |    |                                        |      |       |    |       |
| GG                         | 107 | -5.9                                    | -17.8    | to | 6.0   | -0.9                                  | -10.7 | to | 9.0                                    | -5.5 | -16.5 | to | 5.4   |
| CG                         | 229 | 0.5                                     | -6.4     | to | 7.4   | 1.7                                   | -3.8  | to | 7.2                                    | -0.1 | -6.7  | to | 6.5   |
| CC                         | 138 | -2.4                                    | -10.1    | to | 5.4   | -1.2                                  | -7.8  | to | 5.4                                    | -2.1 | -9.5  | to | 5.4   |
| P interaction <sup>f</sup> |     |                                         |          |    | 0.644 |                                       |       |    | 0.883                                  |      |       |    | 0.584 |
| <b>PON1-161</b>            |     |                                         |          |    |       |                                       |       |    |                                        |      |       |    |       |
| GG <sup>e</sup>            | 37  | -11.9                                   | -34.6    | to | 10.7  | -16.8                                 | -35.9 | to | 2.3                                    | -9.3 | -32.3 | to | 13.6  |
| CG                         | 172 | -2.1                                    | -9.7     | to | 5.5   | 4.6                                   | -1.2  | to | 10.4                                   | -3.8 | -11.1 | to | 3.5   |
| CC                         | 265 | -2.8                                    | -9.1     | to | 3.5   | -2.4                                  | -7.8  | to | 2.9                                    | -2.3 | -8.2  | to | 3.6   |
| P interaction <sup>f</sup> |     |                                         |          |    | 0.831 |                                       |       |    | 0.676                                  |      |       |    | 0.870 |

a. Adjusted for child sex, maternal age, ethnicity (Dutch, other-western and non-western), education (low, intermediate, and high), income (low, middle, and high), marital status, maternal alcohol consumption (no alcohol consumption during pregnancy, alcohol consumption until pregnancy was known, occasional alcohol consumption during pregnancy, and frequent alcohol consumption during pregnancy), maternal non-verbal IQ, BMI categories (<18.5, 18.5-25, 25-30, and 30+), height of the mother, parity categories (0, 1, and 2+), Home IT quartiles, and smoking categories (no smoking during pregnancy, smoked until pregnancy was known, and smoked during pregnancy).

b. Total dialkyl phosphates is the sum of DEDTP, DETP, DEP, DMDTP, DMTP and DMP.

c. Diethyl alkyl phosphates is the sum of DEDTP, DETP and DEP.

d. Dimethyl alkyl phosphates is the sum of DMDTP, DMTP and DMP.

e. BMI included as a continuous variable for PON1Q192 and PON1-161 because of missing levels in BMI for RR and GG.

f. P-value based on interaction where the PON-1 type was treated as an ordinal variable.

**Table S7. Fully adjusted:** Difference in child nonverbal IQ test score at age 6 years (and 95% confidence interval) per log10 nmol/g creatinine increase in maternal (**average pregnancy**) urine dialkyl phosphate metabolite concentration by **PON1 type** (N=474).

|                            | N   | Adjusted models <sup>a</sup>            |          |    |         |                                       |       |         |          |                                        |       |    |       |
|----------------------------|-----|-----------------------------------------|----------|----|---------|---------------------------------------|-------|---------|----------|----------------------------------------|-------|----|-------|
|                            |     | Dialkyl phosphates (total) <sup>b</sup> |          |    |         | Diethyl alkyl phosphates <sup>c</sup> |       |         |          | Dimethyl alkyl phosphates <sup>d</sup> |       |    |       |
|                            |     | Averaged across pregnancy               |          |    |         | Averaged across pregnancy             |       |         |          | Averaged across pregnancy              |       |    |       |
|                            |     | $\beta$                                 | (95% CI) |    | $\beta$ | (95% CI)                              |       | $\beta$ | (95% CI) |                                        |       |    |       |
| PON1Q192                   |     |                                         |          |    |         |                                       |       |         |          |                                        |       |    |       |
| QQ (TT)                    | 226 | -2.6                                    | -11.8    | to | 6.6     | 2.0                                   | -4.8  | to      | 8.8      | -3.6                                   | -12.5 | to | 5.2   |
| QR (CT)                    | 202 | 3.5                                     | -6.2     | to | 13.1    | 6.8                                   | -1.5  | to      | 15.2     | 2.6                                    | -6.5  | to | 11.7  |
| RR (CC) <sup>e</sup>       | 46  | -7.7                                    | -35.9    | to | 20.6    | 4.3                                   | -15.9 | to      | 24.5     | -11.6                                  | -40.5 | to | 17.4  |
| P interaction <sup>f</sup> |     |                                         |          |    | 0.786   |                                       |       |         | 0.886    |                                        |       |    | 0.800 |
| PON1L55                    |     |                                         |          |    |         |                                       |       |         |          |                                        |       |    |       |
| TT                         | 65  | 1.0                                     | -18.4    | to | 20.4    | 1.2                                   | -12.0 | to      | 14.4     | 1.0                                    | -18.4 | to | 20.5  |
| AT                         | 198 | -5.0                                    | -15.8    | to | 5.9     | 1.8                                   | -20.7 | to      | 10.2     | -5.4                                   | -20.7 | to | 4.8   |
| AA                         | 211 | 2.0                                     | -6.5     | to | 10.5    | 4.8                                   | -2.3  | to      | 11.9     | 0.9                                    | -7.2  | to | 9.0   |
| P interaction <sup>f</sup> |     |                                         |          |    | 0.675   |                                       |       |         | 0.721    |                                        |       |    | 0.724 |
| PON1-108                   |     |                                         |          |    |         |                                       |       |         |          |                                        |       |    |       |
| TT                         | 90  | -2.5                                    | -20.1    | to | 15.0    | 6.3                                   | -6.4  | to      | 19.0     | -4.9                                   | -21.5 | to | 11.8  |
| CT                         | 232 | 2.3                                     | -7.3     | to | 11.8    | 3.3                                   | -4.3  | to      | 10.8     | 1.3                                    | -7.9  | to | 10.5  |
| CC                         | 152 | -1.2                                    | -11.4    | to | 9.1     | 3.5                                   | -5.0  | to      | 12.1     | -1.6                                   | -11.3 | to | 8.1   |
| P interaction <sup>f</sup> |     |                                         |          |    | 0.631   |                                       |       |         | 0.569    |                                        |       |    | 0.826 |
| PON1-909                   |     |                                         |          |    |         |                                       |       |         |          |                                        |       |    |       |
| GG                         | 107 | -5.1                                    | -20.7    | to | 10.6    | 2.1                                   | -8.9  | to      | 13.1     | -5.8                                   | -20.7 | to | 9.1   |
| CG                         | 229 | 3.1                                     | -6.2     | to | 12.4    | 3.4                                   | -4.2  | to      | 11.0     | 2.1                                    | -6.8  | to | 11.0  |
| CC                         | 138 | -0.7                                    | -11.9    | to | 10.5    | 5.2                                   | -3.9  | to      | 14.3     | -1.5                                   | -12.1 | to | 9.1   |
| P interaction <sup>f</sup> |     |                                         |          |    | 0.763   |                                       |       |         | 0.888    |                                        |       |    | 0.891 |
| PON1-161                   |     |                                         |          |    |         |                                       |       |         |          |                                        |       |    |       |
| GG <sup>e</sup>            | 37  | -0.4                                    | -31.7    | to | 30.8    | -4.3                                  | -34.4 | to      | 25.7     | 0.1                                    | -28.7 | to | 28.9  |
| CG                         | 172 | -5.1                                    | -15.1    | to | 4.9     | 2.7                                   | -5.7  | to      | 11.1     | -5.9                                   | -15.3 | to | 3.5   |
| CC                         | 265 | 0.6                                     | -8.2     | to | 9.3     | 3.9                                   | -2.8  | to      | 10.5     | -0.7                                   | -9.1  | to | 7.8   |
| P interaction <sup>f</sup> |     |                                         |          |    | 0.998   |                                       |       |         | 0.650    |                                        |       |    | 0.792 |

a. Adjusted for child sex, maternal age, ethnicity (Dutch, other-western and non-western), education (low, intermediate, and high), income (low, middle, and high), marital status, maternal alcohol consumption (no alcohol consumption during pregnancy, alcohol consumption until pregnancy was known, occasional alcohol consumption during pregnancy, and frequent alcohol consumption during pregnancy), maternal non-verbal IQ, BMI categories (<18.5, 18.5-25, 25-30, and 30+), height of the mother, parity categories (0, 1, and 2+), Home IT quartiles, and smoking categories (no smoking during pregnancy, smoked until pregnancy was known, and smoked during pregnancy).

b. Total dialkyl phosphates is the sum of DEDTP, DETP, DEP, DMDTP, DMTP and DMP.

c. Diethyl alkyl phosphates is the sum of DEDTP, DETP and DEP.

d. Dimethyl alkyl phosphates is the sum of DMDTP, DMTP and DMP

e. BMI included as a continuous variable for PON1Q192 and PON1-161 because of missing levels in BMI for RR and GG.

f. P-value based on interaction where the PON-1 type was treated as an ordinal variable.

**Table S8. Difference in child sex, maternal age, ethnicity, and educational level adjusted child nonverbal IQ test score at age 6 years (and 95% confidence interval) per log<sub>10</sub> nmol/g creatinine increase in maternal (<18 weeks) urine dialkyl phosphate metabolite concentration by PON1 type (N=474).**

|          |                            | N        | Adjusted models <sup>a</sup>            |           |         |                                       |           |         |                                        |           |         |
|----------|----------------------------|----------|-----------------------------------------|-----------|---------|---------------------------------------|-----------|---------|----------------------------------------|-----------|---------|
|          |                            |          | Dialkyl phosphates (total) <sup>b</sup> |           |         | Diethyl alkyl phosphates <sup>c</sup> |           |         | Dimethyl alkyl phosphates <sup>d</sup> |           |         |
|          |                            |          | $\beta$                                 | <18 weeks |         | $\beta$                               | <18 weeks |         | $\beta$                                | <18 weeks |         |
|          |                            | (95% CI) |                                         | (95% CI)  |         | (95% CI)                              |           |         |                                        |           |         |
| PON1Q192 |                            |          |                                         |           |         |                                       |           |         |                                        |           |         |
|          | QQ (TT)                    | 226      | 1.5                                     | -4.6      | to 7.5  | 4.9                                   | -0.1      | to 10.0 | 0.0                                    | -5.8      | to 5.8  |
|          | QR (CT)                    | 202      | -3.5                                    | -9.7      | to 2.6  | -3.8                                  | -7.5      | to -0.1 | -3.5                                   | -9.4      | to 2.4  |
|          | RR (CC)                    | 46       | -0.5                                    | -16.6     | to 15.5 | 0.9                                   | -10.7     | to 12.5 | -0.6                                   | -15.3     | to 14.2 |
|          | P interaction <sup>e</sup> |          |                                         |           | 0.361   |                                       |           | 0.039   |                                        |           | 0.537   |
| PON1L55  |                            |          |                                         |           |         |                                       |           |         |                                        |           |         |
|          | TT                         | 65       | 2.8                                     | -8.7      | to 14.4 | 2.6                                   | -6.7      | to 11.9 | 2.6                                    | -8.4      | to 13.6 |
|          | AT                         | 198      | -3.4                                    | -10.2     | to 3.5  | -0.3                                  | -13.5     | to 5.0  | -4.3                                   | -13.5     | to 2.3  |
|          | AA                         | 211      | -1.6                                    | -7.5      | to 4.4  | -2.3                                  | -5.9      | to 1.4  | -1.9                                   | -7.5      | to 3.8  |
|          | P interaction <sup>e</sup> |          |                                         |           | 0.818   |                                       |           | 0.299   |                                        |           | 0.866   |
| PON1-108 |                            |          |                                         |           |         |                                       |           |         |                                        |           |         |
|          | TT                         | 90       | -4.6                                    | -14.5     | to 5.3  | 0.6                                   | -6.2      | to 7.5  | -6.8                                   | -16.4     | to 2.8  |
|          | CT                         | 232      | 1.3                                     | -5.0      | to 7.7  | 2.3                                   | -3.2      | to 7.8  | 0.8                                    | -5.3      | to 6.9  |
|          | CC                         | 152      | -3.1                                    | -9.8      | to 3.6  | -2.9                                  | -6.6      | to 0.9  | -3.1                                   | -9.5      | to 3.3  |
|          | P interaction <sup>e</sup> |          |                                         |           | 0.700   |                                       |           | 0.213   |                                        |           | 0.992   |
| PON1-909 |                            |          |                                         |           |         |                                       |           |         |                                        |           |         |
|          | GG                         | 107      | -3.9                                    | -13.5     | to 5.6  | 0.0                                   | -6.5      | to 6.6  | -5.9                                   | -15.1     | to 3.4  |
|          | CG                         | 229      | 1.3                                     | -4.9      | to 7.5  | 1.8                                   | -3.6      | to 7.3  | 1.0                                    | -5.0      | to 6.9  |
|          | CC                         | 138      | -3.2                                    | -10.5     | to 4.2  | -2.4                                  | -6.3      | to 1.5  | -3.6                                   | -10.6     | to 3.4  |
|          | P interaction <sup>e</sup> |          |                                         |           | 0.679   |                                       |           | 0.319   |                                        |           | 0.891   |
| PON1-161 |                            |          |                                         |           |         |                                       |           |         |                                        |           |         |
|          | GG                         | 37       | 4.0                                     | -10.0     | to 18.0 | 11.8                                  | -2.9      | to 26.6 | 3.8                                    | -9.4      | to 17.0 |
|          | CG                         | 172      | -2.2                                    | -8.3      | to 3.9  | 0.0                                   | -5.4      | to 5.4  | -2.3                                   | -8.2      | to 3.5  |
|          | CC                         | 265      | -2.2                                    | -8.3      | to 3.8  | -2.2                                  | -5.7      | to 1.3  | -3.2                                   | -9.0      | to 2.6  |
|          | P interaction <sup>e</sup> |          |                                         |           | 0.621   |                                       |           | 0.150   |                                        |           | 0.465   |

a. Adjusted for child sex, maternal age, ethnicity (Dutch, other-western, and non-western), and education (low, intermediate, and high).

b. Total dialkyl phosphates is the sum of DEDTP, DETP, DEP, DMDTP, DMTP and DMP.

c. Diethyl alkyl phosphates is the sum of DEDTP, DETP and DEP.

d. Dimethyl alkyl phosphates is the sum of DMDTP, DMTP and DMP.

e. P-value based on interaction where the PON-1 type was treated as an ordinal variable.

**Table S9. Difference in child sex, maternal age, ethnicity, and educational level adjusted child nonverbal IQ test score at age 6 years (and 95% confidence interval) per log<sub>10</sub> nmol/g creatinine increase in maternal (18-25 weeks) urine dialkyl phosphate metabolite concentration by PON1 type (N=474).**

|                            | N   | Adjusted models <sup>a</sup>                           |          |    |       |                                                      |       |    |          |                                                       |       |    |       |
|----------------------------|-----|--------------------------------------------------------|----------|----|-------|------------------------------------------------------|-------|----|----------|-------------------------------------------------------|-------|----|-------|
|                            |     | Dialkyl phosphates (total) <sup>b</sup><br>18-25 weeks |          |    |       | Diethyl alkyl phosphates <sup>c</sup><br>18-25 weeks |       |    |          | Dimethyl alkyl phosphates <sup>d</sup><br>18-25 weeks |       |    |       |
|                            |     | β                                                      | (95% CI) |    | β     | (95% CI)                                             |       | β  | (95% CI) |                                                       |       |    |       |
| PON1Q192                   |     |                                                        |          |    |       |                                                      |       |    |          |                                                       |       |    |       |
| QQ (TT)                    | 226 | 1.7                                                    | -4.9     | to | 8.3   | 1.5                                                  | -3.2  | to | 6.1      | 1.3                                                   | -5.1  | to | 7.7   |
| QR (CT)                    | 202 | 3.4                                                    | -3.9     | to | 10.7  | 2.3                                                  | -1.6  | to | 6.3      | 2.4                                                   | -4.5  | to | 9.3   |
| RR (CC)                    | 46  | 0.4                                                    | -16.2    | to | 16.9  | 0.5                                                  | -11.1 | to | 12.1     | -1.0                                                  | -16.6 | to | 14.7  |
| P interaction <sup>e</sup> |     |                                                        |          |    | 0.801 |                                                      |       |    | 0.887    |                                                       |       |    | 0.620 |
| PON1L55                    |     |                                                        |          |    |       |                                                      |       |    |          |                                                       |       |    |       |
| TT                         | 65  | 4.5                                                    | -8.1     | to | 17.1  | 4.4                                                  | -5.2  | to | 14.0     | 4.1                                                   | -8.1  | to | 16.3  |
| AT                         | 198 | 1.2                                                    | -6.0     | to | 8.4   | 0.1                                                  | -5.9  | to | 5.6      | 1.3                                                   | -5.9  | to | 8.2   |
| AA                         | 211 | 0.8                                                    | -6.4     | to | 8.0   | 2.2                                                  | -1.3  | to | 5.8      | -0.9                                                  | -7.8  | to | 5.9   |
| P interaction <sup>e</sup> |     |                                                        |          |    | 0.553 |                                                      |       |    | 0.929    |                                                       |       |    | 0.348 |
| PON1-108                   |     |                                                        |          |    |       |                                                      |       |    |          |                                                       |       |    |       |
| TT                         | 90  | 7.5                                                    | -4.1     | to | 19.2  | 6.2                                                  | -2.1  | to | 14.4     | 5.7                                                   | -5.6  | to | 17.0  |
| CT                         | 232 | -0.6                                                   | -7.3     | to | 6.2   | 0.1                                                  | -3.7  | to | 4.0      | -0.7                                                  | -7.1  | to | 5.8   |
| CC                         | 152 | 1.8                                                    | -5.5     | to | 9.2   | 3.8                                                  | -1.3  | to | 8.9      | 0.4                                                   | -6.8  | to | 7.6   |
| P interaction <sup>e</sup> |     |                                                        |          |    | 0.353 |                                                      |       |    | 0.864    |                                                       |       |    | 0.279 |
| PON1-909                   |     |                                                        |          |    |       |                                                      |       |    |          |                                                       |       |    |       |
| GG                         | 107 | 4.2                                                    | -5.9     | to | 14.4  | 4.2                                                  | -3.2  | to | 11.6     | 2.8                                                   | -7.0  | to | 12.5  |
| CG                         | 229 | 0.1                                                    | -6.6     | to | 6.9   | 0.2                                                  | -3.6  | to | 4.0      | 0.1                                                   | -6.3  | to | 6.6   |
| CC                         | 138 | 2.5                                                    | -5.3     | to | 10.4  | 4.1                                                  | -1.3  | to | 9.6      | 0.8                                                   | -6.9  | to | 8.5   |
| P interaction <sup>e</sup> |     |                                                        |          |    | 0.586 |                                                      |       |    | 0.741    |                                                       |       |    | 0.471 |
| PON1-161                   |     |                                                        |          |    |       |                                                      |       |    |          |                                                       |       |    |       |
| GG                         | 37  | 19.3                                                   | 0.1      | to | 38.6  | 4.5                                                  | -6.6  | to | 15.7     | 17.9                                                  | -0.8  | to | 36.6  |
| CG                         | 172 | -1.7                                                   | -8.9     | to | 5.6   | 1.2                                                  | -2.5  | to | 4.9      | -1.6                                                  | -8.5  | to | 5.2   |
| CC                         | 265 | 3.2                                                    | -3.2     | to | 9.5   | 2.8                                                  | -1.9  | to | 7.5      | 2.2                                                   | -4.0  | to | 8.4   |
| P interaction <sup>e</sup> |     |                                                        |          |    | 0.938 |                                                      |       |    | 0.882    |                                                       |       |    | 0.977 |

a. Adjusted for child sex, maternal age, ethnicity (Dutch, other-western, and non-western), and education (low, intermediate, and high).

b. Total dialkyl phosphates is the sum of DEDTP, DETP, DEP, DMDTP, DMTP and DMP.

c. Diethyl alkyl phosphates is the sum of DEDTP, DETP and DEP.

d. Dimethyl alkyl phosphates is the sum of DMDTP, DMTP and DMP.

e. P-value based on interaction where the PON-1 type was treated as an ordinal variable.

**Table S10. Difference in child sex, maternal age, ethnicity, and educational level adjusted** child nonverbal IQ test score at age 6 years (and 95% confidence interval) per log10 nmol/g creatinine increase in maternal (>25 weeks) urine dialkyl phosphate metabolite concentration by **PON1 type** (N=474).

|                            | N   | Adjusted models <sup>a</sup>            |          |    |         |                                       |       |         |          |                                        |       |    |       |
|----------------------------|-----|-----------------------------------------|----------|----|---------|---------------------------------------|-------|---------|----------|----------------------------------------|-------|----|-------|
|                            |     | Dialkyl phosphates (total) <sup>b</sup> |          |    |         | Diethyl alkyl phosphates <sup>c</sup> |       |         |          | Dimethyl alkyl phosphates <sup>d</sup> |       |    |       |
|                            |     | $\beta$                                 | (95% CI) |    | $\beta$ | (95% CI)                              |       | $\beta$ | (95% CI) |                                        |       |    |       |
| PON1Q192                   |     |                                         |          |    |         |                                       |       |         |          |                                        |       |    |       |
| QQ (TT)                    | 226 | -7.1                                    | -13.6    | to | -0.6    | -0.5                                  | -5.5  | to      | 4.5      | -7.3                                   | -13.6 | to | -0.9  |
| QR (CT)                    | 202 | 2.8                                     | -3.9     | to | 9.4     | 2.7                                   | -3.1  | to      | 8.5      | 2.3                                    | -3.9  | to | 8.5   |
| RR (CC)                    | 46  | -5.4                                    | -20.0    | to | 9.3     | 0.4                                   | -9.2  | to      | 9.9      | -7.7                                   | -23.2 | to | 7.8   |
| P interaction <sup>e</sup> |     |                                         |          |    | 0.548   |                                       |       |         | 0.849    |                                        |       |    | 0.637 |
| PON1L55                    |     |                                         |          |    |         |                                       |       |         |          |                                        |       |    |       |
| TT                         | 65  | -3.3                                    | -15.3    | to | 8.8     | -3.5                                  | -13.3 | to      | 6.4      | -1.7                                   | -13.1 | to | 9.7   |
| AT                         | 198 | -5.1                                    | -12.6    | to | 2.4     | 2.1                                   | -18.1 | to      | 8.2      | -5.7                                   | -18.1 | to | 1.4   |
| AA                         | 211 | -0.1                                    | -6.1     | to | 5.9     | -0.4                                  | -5.2  | to      | 4.4      | -0.2                                   | -6.0  | to | 5.7   |
| P interaction <sup>e</sup> |     |                                         |          |    | 0.468   |                                       |       |         | 0.947    |                                        |       |    | 0.528 |
| PON1-108                   |     |                                         |          |    |         |                                       |       |         |          |                                        |       |    |       |
| TT                         | 90  | -5.5                                    | -17.5    | to | 6.6     | 3.5                                   | -5.9  | to      | 12.8     | -6.5                                   | -17.7 | to | 4.8   |
| CT                         | 232 | -1.3                                    | -7.8     | to | 5.2     | -0.3                                  | -5.5  | to      | 4.8      | -1.4                                   | -7.7  | to | 4.8   |
| CC                         | 152 | -1.7                                    | -8.3     | to | 5.0     | 1.0                                   | -4.6  | to      | 6.6      | -1.7                                   | -8.0  | to | 4.6   |
| P interaction <sup>e</sup> |     |                                         |          |    | 0.566   |                                       |       |         | 0.980    |                                        |       |    | 0.481 |
| PON1-909                   |     |                                         |          |    |         |                                       |       |         |          |                                        |       |    |       |
| GG                         | 107 | -7.1                                    | -18.1    | to | 3.8     | -0.6                                  | -9.0  | to      | 7.7      | -7.3                                   | -17.5 | to | 2.9   |
| CG                         | 229 | -0.8                                    | -7.2     | to | 5.6     | 1.3                                   | -3.8  | to      | 6.4      | -1.2                                   | -7.4  | to | 5.0   |
| CC                         | 138 | -1.4                                    | -8.5     | to | 5.7     | 0.4                                   | -5.7  | to      | 6.4      | -1.4                                   | -8.2  | to | 5.4   |
| P interaction <sup>e</sup> |     |                                         |          |    | 0.495   |                                       |       |         | 0.769    |                                        |       |    | 0.442 |
| PON1-161                   |     |                                         |          |    |         |                                       |       |         |          |                                        |       |    |       |
| GG                         | 37  | -0.4                                    | -15.8    | to | 15.0    | -4.0                                  | -17.0 | to      | 8.9      | 1.0                                    | -14.2 | to | 16.3  |
| CG                         | 172 | -2.5                                    | -9.5     | to | 4.5     | 3.1                                   | -2.2  | to      | 8.3      | -3.5                                   | -10.2 | to | 3.2   |
| CC                         | 265 | -3.5                                    | -9.4     | to | 2.5     | -1.2                                  | -6.2  | to      | 3.8      | -3.3                                   | -9.0  | to | 2.3   |
| P interaction <sup>e</sup> |     |                                         |          |    | 0.828   |                                       |       |         | 0.805    |                                        |       |    | 0.831 |

a. Adjusted for child sex, maternal age, ethnicity (Dutch, other-western, and non-western), and education (low, intermediate, and high).

b. Total dialkyl phosphates is the sum of DEDTP, DETP, DEP, DMDTP, DMTP and DMP.

c. Diethyl alkyl phosphates is the sum of DEDTP, DETP and DEP.

d. Dimethyl alkyl phosphates is the sum of DMDTP, DMTP and DMP.

e. P-value based on interaction where the PON-1 type was treated as an ordinal variable.

**Table S11. Difference in child sex, maternal age, ethnicity, and educational level adjusted child nonverbal IQ test score at age 6 years (and 95% confidence interval) per log10 nmol/g creatinine increase in maternal (average pregnancy) urine dialkyl phosphate metabolite concentration by PON1 type (N=474).**

|                            | N   | Adjusted models <sup>a</sup>            |          |    |         |                                       |       |         |          |                                        |       |    |       |
|----------------------------|-----|-----------------------------------------|----------|----|---------|---------------------------------------|-------|---------|----------|----------------------------------------|-------|----|-------|
|                            |     | Dialkyl phosphates (total) <sup>b</sup> |          |    |         | Diethyl alkyl phosphates <sup>c</sup> |       |         |          | Dimethyl alkyl phosphates <sup>d</sup> |       |    |       |
|                            |     | Averaged across pregnancy               |          |    |         | Averaged across pregnancy             |       |         |          | Averaged across pregnancy              |       |    |       |
|                            |     | $\beta$                                 | (95% CI) |    | $\beta$ | (95% CI)                              |       | $\beta$ | (95% CI) |                                        |       |    |       |
| PON1Q192                   |     |                                         |          |    |         |                                       |       |         |          |                                        |       |    |       |
| QQ (TT)                    | 226 | -3.4                                    | -12.4    | to | 5.5     | 2.6                                   | -3.9  | to      | 9.2      | -4.7                                   | -13.2 | to | 3.8   |
| QR (CT)                    | 202 | 2.7                                     | -6.2     | to | 11.5    | 6.0                                   | -1.8  | to      | 13.8     | 2.0                                    | -6.3  | to | 10.3  |
| RR (CC)                    | 46  | -5.0                                    | -24.3    | to | 14.3    | 1.2                                   | -12.1 | to      | 14.5     | -6.9                                   | -26.6 | to | 12.7  |
| P interaction <sup>e</sup> |     |                                         |          |    | 0.966   |                                       |       |         | 0.988    |                                        |       |    | 0.970 |
| PON1L55                    |     |                                         |          |    |         |                                       |       |         |          |                                        |       |    |       |
| TT                         | 65  | -1.2                                    | -18.3    | to | 15.9    | 1.0                                   | -11.0 | to      | 13.1     | -0.8                                   | -17.0 | to | 15.5  |
| AT                         | 198 | -3.6                                    | -13.6    | to | 6.4     | 3.5                                   | -18.2 | to      | 11.3     | -4.7                                   | -18.2 | to | 4.8   |
| AA                         | 211 | -0.3                                    | -8.3     | to | 7.6     | 2.6                                   | -4.0  | to      | 9.3      | -1.0                                   | -8.7  | to | 6.6   |
| P interaction <sup>e</sup> |     |                                         |          |    | 0.805   |                                       |       |         | 0.977    |                                        |       |    | 0.823 |
| PON1-108                   |     |                                         |          |    |         |                                       |       |         |          |                                        |       |    |       |
| TT                         | 90  | -3.2                                    | -18.0    | to | 11.6    | 5.7                                   | -4.8  | to      | 16.1     | -6.2                                   | -20.5 | to | 8.0   |
| CT                         | 232 | 0.3                                     | -8.7     | to | 9.3     | 2.9                                   | -4.2  | to      | 10.0     | -0.5                                   | -9.1  | to | 8.1   |
| CC                         | 152 | -1.3                                    | -10.2    | to | 7.5     | 2.7                                   | -4.8  | to      | 10.2     | -1.5                                   | -10.0 | to | 7.0   |
| P interaction <sup>e</sup> |     |                                         |          |    | 0.852   |                                       |       |         | 0.659    |                                        |       |    | 0.930 |
| PON1-909                   |     |                                         |          |    |         |                                       |       |         |          |                                        |       |    |       |
| GG                         | 107 | -4.6                                    | -18.2    | to | 9.0     | 3.5                                   | -6.1  | to      | 13.0     | -6.5                                   | -19.5 | to | 6.6   |
| CG                         | 229 | 1.1                                     | -7.6     | to | 9.8     | 3.0                                   | -4.1  | to      | 10.1     | 0.2                                    | -8.1  | to | 8.5   |
| CC                         | 138 | -0.8                                    | -10.4    | to | 8.9     | 4.2                                   | -3.6  | to      | 12.1     | -1.2                                   | -10.4 | to | 8.0   |
| P interaction <sup>e</sup> |     |                                         |          |    | 0.994   |                                       |       |         | 0.984    |                                        |       |    | 0.849 |
| PON1-161                   |     |                                         |          |    |         |                                       |       |         |          |                                        |       |    |       |
| GG                         | 37  | 7.5                                     | -11.2    | to | 26.2    | 3.1                                   | -14.3 | to      | 20.5     | 8.7                                    | -9.0  | to | 26.5  |
| CG                         | 172 | -4.3                                    | -13.3    | to | 4.8     | 1.7                                   | -5.9  | to      | 9.3      | -4.6                                   | -13.0 | to | 3.9   |
| CC                         | 265 | -0.9                                    | -9.4     | to | 7.5     | 4.1                                   | -2.3  | to      | 10.4     | -2.4                                   | -10.5 | to | 5.7   |
| P interaction <sup>e</sup> |     |                                         |          |    | 0.910   |                                       |       |         | 0.598    |                                        |       |    | 0.668 |

a. Adjusted for child sex, maternal age, ethnicity (Dutch, other-western, and non-western), and education (low, intermediate, and high).

b. Total dialkyl phosphates is the sum of DEDTP, DETP, DEP, DMDTP, DMTP and DMP.

c. Diethyl alkyl phosphates is the sum of DEDTP, DETP and DEP.

d. Dimethyl alkyl phosphates is the sum of DMDTP, DMTP and DMP.

e. P-value based on interaction where the PON-1 type was treated as an ordinal variable.

**Table S12. Difference in child sex, maternal age, and educational level adjusted child nonverbal IQ test score at age 6 years (and 95% confidence interval) per log10 nmol/g creatinine increase in maternal (<18 weeks) urine dialkyl phosphate metabolite concentration in Dutch women, by PON1 type (N=277).**

|          |                            | N   | Adjusted models <sup>a</sup>                         |          |    |                                                    |          |       |                                                     |          |       |       |    |       |
|----------|----------------------------|-----|------------------------------------------------------|----------|----|----------------------------------------------------|----------|-------|-----------------------------------------------------|----------|-------|-------|----|-------|
|          |                            |     | Dialkyl phosphates (total) <sup>b</sup><br><18 weeks |          |    | Diethyl alkyl phosphates <sup>c</sup><br><18 weeks |          |       | Dimethyl alkyl phosphates <sup>d</sup><br><18 weeks |          |       |       |    |       |
|          |                            |     | $\beta$                                              | (95% CI) |    | $\beta$                                            | (95% CI) |       | $\beta$                                             | (95% CI) |       |       |    |       |
| PON1Q192 |                            |     |                                                      |          |    |                                                    |          |       |                                                     |          |       |       |    |       |
|          | QQ (TT)                    | 226 | 0.3                                                  | -7.9     | to | 8.4                                                | 5.5      | -1.3  | to                                                  | 12.3     | -1.6  | -9.3  | to | 6.2   |
|          | QR (CT)                    | 202 | -3.3                                                 | -12.4    | to | 5.7                                                | -4.5     | -8.7  | to                                                  | -0.2     | -2.7  | -11.2 | to | 5.9   |
|          | RR (CC)                    | 46  | -8.0                                                 | -42.0    | to | 26.1                                               | 0.2      | -16.3 | to                                                  | 16.7     | -11.2 | -40.6 | to | 18.1  |
|          | P interaction <sup>e</sup> |     |                                                      |          |    | 0.768                                              |          |       |                                                     | 0.104    |       |       |    | 0.921 |
| PON1L55  |                            |     |                                                      |          |    |                                                    |          |       |                                                     |          |       |       |    |       |
|          | TT                         | 65  | -0.4                                                 | -16.5    | to | 15.7                                               | -0.8     | -13.5 | to                                                  | 11.9     | -0.7  | -16.2 | to | 14.9  |
|          | AT                         | 198 | -0.4                                                 | -10.0    | to | 9.2                                                | -0.2     | -18.9 | to                                                  | 6.6      | -1.4  | -18.9 | to | 7.6   |
|          | AA                         | 211 | -5.4                                                 | -14.6    | to | 3.8                                                | -3.2     | -7.6  | to                                                  | 1.2      | -5.9  | -14.6 | to | 2.8   |
|          | P interaction <sup>e</sup> |     |                                                      |          |    | 0.579                                              |          |       |                                                     | 0.502    |       |       |    | 0.572 |
| PON1-108 |                            |     |                                                      |          |    |                                                    |          |       |                                                     |          |       |       |    |       |
|          | TT                         | 90  | -5.8                                                 | -20.3    | to | 8.7                                                | 0.2      | -8.2  | to                                                  | 8.5      | -8.5  | -22.4 | to | 5.4   |
|          | CT                         | 232 | 1.6                                                  | -7.3     | to | 10.5                                               | 1.3      | -6.2  | to                                                  | 8.7      | 1.3   | -7.1  | to | 9.8   |
|          | CC                         | 152 | -5.3                                                 | -15.2    | to | 4.6                                                | -3.9     | -8.4  | to                                                  | 0.7      | -5.1  | -14.4 | to | 4.3   |
|          | P interaction <sup>e</sup> |     |                                                      |          |    | 0.715                                              |          |       |                                                     | 0.280    |       |       |    | 0.987 |
| PON1-909 |                            |     |                                                      |          |    |                                                    |          |       |                                                     |          |       |       |    |       |
|          | GG                         | 107 | -4.7                                                 | -18.9    | to | 9.5                                                | 0.0      | -8.1  | to                                                  | 8.1      | -7.2  | -21.0 | to | 6.5   |
|          | CG                         | 229 | 3.6                                                  | -4.9     | to | 12.2                                               | 1.5      | -6.0  | to                                                  | 9.1      | 3.5   | -4.5  | to | 11.5  |
|          | CC                         | 138 | -8.1                                                 | -18.6    | to | 2.3                                                | -3.9     | -8.5  | to                                                  | 0.7      | -8.4  | -18.3 | to | 1.6   |
|          | P interaction <sup>e</sup> |     |                                                      |          |    | 0.533                                              |          |       |                                                     | 0.295    |       |       |    | 0.717 |
| PON1-161 |                            |     |                                                      |          |    |                                                    |          |       |                                                     |          |       |       |    |       |
|          | GG                         | 37  | -2.3                                                 | -37.8    | to | 33.3                                               | 17.6     | -25.4 | to                                                  | 60.6     | 0.8   | -29.1 | to | 30.8  |
|          | CG                         | 172 | -1.3                                                 | -10.1    | to | 7.6                                                | 2.0      | -5.2  | to                                                  | 9.2      | -2.0  | -10.4 | to | 6.4   |
|          | CC                         | 265 | -2.8                                                 | -11.1    | to | 5.4                                                | -3.4     | -7.5  | to                                                  | 0.6      | -3.6  | -11.4 | to | 4.2   |
|          | P interaction <sup>e</sup> |     |                                                      |          |    | 0.772                                              |          |       |                                                     | 0.105    |       |       |    | 0.642 |

a. Adjusted for child sex, maternal age, and maternal education (low, intermediate, and high).

b. Total dialkyl phosphates is the sum of DEDTP, DETP, DEP, DMDTP, DMTP and DMP.

c. Diethyl alkyl phosphates is the sum of DEDTP, DETP and DEP.

d. Dimethyl alkyl phosphates is the sum of DMDTP, DMTP and DMP.

e. P-value based on interaction where the PON-1 type was treated as an ordinal variable.



**Table S13. Difference in maternal age, child sex, and educational level adjusted child nonverbal IQ test score at age 6 years (and 95% confidence interval) per log10 nmol/g creatinine increase in maternal (18-25 weeks) urine dialkyl phosphate metabolite concentration in Dutch women, by PON1 type (N=277).**

|          |                            | N       | Adjusted models <sup>a</sup>            |       |         |                                       |      |         |                                        |       |      |       |    |       |
|----------|----------------------------|---------|-----------------------------------------|-------|---------|---------------------------------------|------|---------|----------------------------------------|-------|------|-------|----|-------|
|          |                            |         | Dialkyl phosphates (total) <sup>b</sup> |       |         | Diethyl alkyl phosphates <sup>c</sup> |      |         | Dimethyl alkyl phosphates <sup>d</sup> |       |      |       |    |       |
|          |                            |         | 18-25 weeks                             |       |         | 18-25 weeks                           |      |         | 18-25 weeks                            |       |      |       |    |       |
|          |                            | $\beta$ | (95% CI)                                |       | $\beta$ | (95% CI)                              |      | $\beta$ | (95% CI)                               |       |      |       |    |       |
| PON1Q192 |                            |         |                                         |       |         |                                       |      |         |                                        |       |      |       |    |       |
|          | QQ (TT)                    | 226     | 1.5                                     | -7.3  | to      | 10.3                                  | 1.2  | -4.9    | to                                     | 7.3   | 1.2  | -7.5  | to | 9.9   |
|          | QR (CT)                    | 202     | 4.0                                     | -6.0  | to      | 14.0                                  | 2.1  | -2.6    | to                                     | 6.8   | 3.1  | -6.2  | to | 12.5  |
|          | RR (CC)                    | 46      | 1.0                                     | -40.0 | to      | 42.0                                  | -0.2 | -22.6   | to                                     | 22.3  | 0.2  | -42.8 | to | 43.3  |
|          | P interaction <sup>e</sup> |         |                                         |       |         | 0.723                                 |      |         |                                        | 0.642 |      |       |    | 0.820 |
| PON1L55  |                            |         |                                         |       |         |                                       |      |         |                                        |       |      |       |    |       |
|          | TT                         | 65      | 13.2                                    | -4.4  | to      | 30.9                                  | 8.3  | -4.3    | to                                     | 20.8  | 12.3 | -6.1  | to | 30.7  |
|          | AT                         | 198     | 1.3                                     | -8.4  | to      | 10.9                                  | -0.2 | -10.3   | to                                     | 7.2   | 1.8  | -10.3 | to | 11.2  |
|          | AA                         | 211     | 0.8                                     | -9.8  | to      | 11.3                                  | 2.1  | -2.3    | to                                     | 6.5   | -0.9 | -10.8 | to | 9.0   |
|          | P interaction <sup>e</sup> |         |                                         |       |         | 0.417                                 |      |         |                                        | 0.922 |      |       |    | 0.301 |
| PON1-108 |                            |         |                                         |       |         |                                       |      |         |                                        |       |      |       |    |       |
|          | TT                         | 90      | 1.9                                     | -12.5 | to      | 16.4                                  | 3.1  | -7.2    | to                                     | 13.5  | 1.1  | -13.3 | to | 15.5  |
|          | CT                         | 232     | 2.9                                     | -6.7  | to      | 12.4                                  | 1.1  | -3.2    | to                                     | 5.3   | 2.3  | -6.9  | to | 11.5  |
|          | CC                         | 152     | -1.3                                    | -12.9 | to      | 10.3                                  | 3.5  | -4.9    | to                                     | 11.9  | -2.2 | -13.3 | to | 8.9   |
|          | P interaction <sup>e</sup> |         |                                         |       |         | 0.422                                 |      |         |                                        | 0.999 |      |       |    | 0.365 |
| PON1-909 |                            |         |                                         |       |         |                                       |      |         |                                        |       |      |       |    |       |
|          | GG                         | 107     | 3.4                                     | -10.3 | to      | 17.2                                  | 4.3  | -5.4    | to                                     | 14.0  | 2.4  | -11.0 | to | 15.7  |
|          | CG                         | 229     | 3.5                                     | -5.7  | to      | 12.6                                  | 0.9  | -3.3    | to                                     | 5.0   | 3.7  | -5.2  | to | 12.6  |
|          | CC                         | 138     | -1.7                                    | -14.6 | to      | 11.1                                  | 3.5  | -5.8    | to                                     | 12.9  | -3.1 | -15.2 | to | 9.0   |
|          | P interaction <sup>e</sup> |         |                                         |       |         | 0.403                                 |      |         |                                        | 0.816 |      |       |    | 0.349 |
| PON1-161 |                            |         |                                         |       |         |                                       |      |         |                                        |       |      |       |    |       |
|          | GG                         | 37      | 13.9                                    | -25.1 | to      | 53.0                                  | 1.4  | -25.9   | to                                     | 28.7  | 14.0 | -21.5 | to | 49.5  |
|          | CG                         | 172     | -6.4                                    | -15.9 | to      | 3.1                                   | 0.6  | -3.4    | to                                     | 4.7   | -6.2 | -15.3 | to | 3.0   |
|          | CC                         | 265     | 7.6                                     | -1.2  | to      | 16.5                                  | 4.8  | -1.8    | to                                     | 11.4  | 6.8  | -1.9  | to | 15.4  |
|          | P interaction <sup>e</sup> |         |                                         |       |         | 0.118                                 |      |         |                                        | 0.287 |      |       |    | 0.134 |

a. Adjusted for child sex, maternal age, and education (low, intermediate, and high).

b. Total dialkyl phosphates is the sum of DEDTP, DETP, DEP, DMDTP, DMTP and DMP.

c. Diethyl alkyl phosphates is the sum of DEDTP, DETP and DEP.

d. Dimethyl alkyl phosphates is the sum of DMDTP, DMTP and DMP.

e. P-value based on interaction where the PON-1 type was treated as an ordinal variable.

**Table S14. Difference in child sex, maternal age, and educational level adjusted child nonverbal IQ test score at age 6 years (and 95% confidence interval) per log10 nmol/g creatinine increase in maternal (>25 weeks) urine dialkyl phosphate metabolite concentration in Dutch women, by PON1 type (N=277).**

|                            | N   | Adjusted models <sup>a</sup>            |          |    |                                       |          |       |                                        |          |       |       |    |       |
|----------------------------|-----|-----------------------------------------|----------|----|---------------------------------------|----------|-------|----------------------------------------|----------|-------|-------|----|-------|
|                            |     | Dialkyl phosphates (total) <sup>b</sup> |          |    | Diethyl alkyl phosphates <sup>c</sup> |          |       | Dimethyl alkyl phosphates <sup>d</sup> |          |       |       |    |       |
|                            |     | $\beta$                                 | (95% CI) |    | $\beta$                               | (95% CI) |       | $\beta$                                | (95% CI) |       |       |    |       |
| PON1Q192                   |     |                                         |          |    |                                       |          |       |                                        |          |       |       |    |       |
| QQ (TT)                    | 226 | -5.9                                    | -15.3    | to | 3.6                                   | -0.9     | -8.1  | to                                     | 6.2      | -6.6  | -15.6 | to | 2.5   |
| QR (CT)                    | 202 | 1.7                                     | -7.2     | to | 10.6                                  | 3.4      | -4.4  | to                                     | 11.2     | 1.0   | -7.4  | to | 9.3   |
| RR (CC)                    | 46  | -14.4                                   | -44.9    | to | 16.1                                  | -3.2     | -17.5 | to                                     | 11.0     | -23.1 | -66.5 | to | 20.3  |
| P interaction <sup>e</sup> |     |                                         |          |    | 0.541                                 |          |       |                                        | 0.592    |       |       |    | 0.626 |
| PON1L55                    |     |                                         |          |    |                                       |          |       |                                        |          |       |       |    |       |
| TT                         | 65  | -6.4                                    | -23.5    | to | 10.6                                  | 8.7      | -7.4  | to                                     | 24.7     | -7.7  | -22.8 | to | 7.4   |
| AT                         | 198 | -3.8                                    | -14.9    | to | 7.3                                   | 1.7      | -27.5 | to                                     | 10.1     | -4.7  | -27.5 | to | 5.8   |
| AA                         | 211 | 1.1                                     | -7.4     | to | 9.7                                   | -0.6     | -7.5  | to                                     | 6.2      | 1.0   | -7.2  | to | 9.2   |
| P interaction <sup>e</sup> |     |                                         |          |    | 0.500                                 |          |       |                                        | 0.302    |       |       |    | 0.355 |
| PON1-108                   |     |                                         |          |    |                                       |          |       |                                        |          |       |       |    |       |
| TT                         | 90  | -11.2                                   | -27.9    | to | 5.5                                   | 8.2      | -5.7  | to                                     | 22.1     | -13.3 | -28.5 | to | 2.0   |
| CT                         | 232 | 4.2                                     | -5.2     | to | 13.6                                  | 0.5      | -6.3  | to                                     | 7.3      | 3.1   | -5.9  | to | 12.2  |
| CC                         | 152 | -2.2                                    | -12.2    | to | 7.9                                   | -1.2     | -10.0 | to                                     | 7.5      | -1.4  | -10.8 | to | 8.1   |
| P interaction <sup>e</sup> |     |                                         |          |    | 0.782                                 |          |       |                                        | 0.238    |       |       |    | 0.480 |
| PON1-909                   |     |                                         |          |    |                                       |          |       |                                        |          |       |       |    |       |
| GG                         | 107 | -12.1                                   | -27.5    | to | 3.4                                   | 3.7      | -8.7  | to                                     | 16.1     | -13.4 | -27.6 | to | 0.8   |
| CG                         | 229 | 5.3                                     | -3.7     | to | 14.3                                  | 2.2      | -4.5  | to                                     | 8.9      | 4.1   | -4.6  | to | 12.7  |
| CC                         | 138 | -3.6                                    | -14.4    | to | 7.1                                   | -4.3     | -13.9 | to                                     | 5.4      | -2.5  | -12.5 | to | 7.6   |
| P interaction <sup>e</sup> |     |                                         |          |    | 0.760                                 |          |       |                                        | 0.247    |       |       |    | 0.479 |
| PON1-161                   |     |                                         |          |    |                                       |          |       |                                        |          |       |       |    |       |
| GG                         | 37  | -5.1                                    | -43.1    | to | 33.0                                  | -10.8    | -39.0 | to                                     | 17.5     | -2.8  | -41.7 | to | 36.1  |
| CG                         | 172 | -5.1                                    | -13.9    | to | 3.6                                   | -0.7     | -7.7  | to                                     | 6.3      | -5.7  | -14.1 | to | 2.7   |
| CC                         | 265 | 2.2                                     | -6.8     | to | 11.1                                  | 3.4      | -3.7  | to                                     | 10.5     | 1.0   | -7.4  | to | 9.4   |
| P interaction <sup>e</sup> |     |                                         |          |    | 0.267                                 |          |       |                                        | 0.145    |       |       |    | 0.342 |

a. Adjusted for child sex, maternal age, and education (low, intermediate, and high).

b. Total dialkyl phosphates is the sum of DEDTP, DETP, DEP, DMDTP, DMTP and DMP.

c. Diethyl alkyl phosphates is the sum of DEDTP, DETP and DEP.

d. Dimethyl alkyl phosphates is the sum of DMDTP, DMTP and DMP.

e. P-value based on interaction where the PON-1 type was treated as an ordinal variable.

**Table S15. Difference in child sex, maternal age, and educational level adjusted child nonverbal IQ test score at age 6 years (and 95% confidence interval) per log10 nmol/g creatinine increase in maternal (average pregnancy) urine dialkyl phosphate metabolite concentration in Dutch women, by PON1 type (N=277).**

|                            | N   | Adjusted models <sup>a</sup>            |          |    |         |                                       |       |         |          |                                        |       |    |       |
|----------------------------|-----|-----------------------------------------|----------|----|---------|---------------------------------------|-------|---------|----------|----------------------------------------|-------|----|-------|
|                            |     | Dialkyl phosphates (total) <sup>b</sup> |          |    |         | Diethyl alkyl phosphates <sup>c</sup> |       |         |          | Dimethyl alkyl phosphates <sup>d</sup> |       |    |       |
|                            |     | Averaged across pregnancy               |          |    |         | Averaged across pregnancy             |       |         |          | Averaged across pregnancy              |       |    |       |
|                            |     | $\beta$                                 | (95% CI) |    | $\beta$ | (95% CI)                              |       | $\beta$ | (95% CI) |                                        |       |    |       |
| PON1Q192                   |     |                                         |          |    |         |                                       |       |         |          |                                        |       |    |       |
| QQ (TT)                    | 226 | -3.4                                    | -16.7    | to | 9.8     | 3.6                                   | -5.6  | to      | 12.8     | -5.7                                   | -18.3 | to | 6.9   |
| QR (CT)                    | 202 | 2.7                                     | -9.8     | to | 15.1    | 7.2                                   | -3.1  | to      | 17.4     | 1.9                                    | -9.7  | to | 13.4  |
| RR (CC)                    | 46  | -15.2                                   | -57.1    | to | 26.8    | -1.1                                  | -22.9 | to      | 20.8     | -22.7                                  | -72.4 | to | 27.0  |
| P interaction <sup>e</sup> |     |                                         |          |    | 0.716   |                                       |       |         | 0.636    |                                        |       |    | 0.708 |
| PON1L55                    |     |                                         |          |    |         |                                       |       |         |          |                                        |       |    |       |
| TT                         | 65  | -4.2                                    | -32.9    | to | 24.6    | 7.8                                   | -10.8 | to      | 26.4     | -8.4                                   | -36.7 | to | 20.0  |
| AT                         | 198 | -0.4                                    | -15.1    | to | 14.4    | 4.0                                   | -29.4 | to      | 14.6     | -1.5                                   | -29.4 | to | 12.2  |
| AA                         | 211 | -0.5                                    | -12.7    | to | 11.7    | 5.8                                   | -4.0  | to      | 15.5     | -1.9                                   | -13.4 | to | 9.6   |
| P interaction <sup>e</sup> |     |                                         |          |    | 0.961   |                                       |       |         | 0.988    |                                        |       |    | 0.900 |
| PON1-108                   |     |                                         |          |    |         |                                       |       |         |          |                                        |       |    |       |
| TT                         | 90  | -9.7                                    | -30.9    | to | 11.5    | 7.2                                   | -7.0  | to      | 21.5     | -13.4                                  | -33.2 | to | 6.4   |
| CT                         | 232 | 7.3                                     | -6.6     | to | 21.2    | 5.1                                   | -4.6  | to      | 14.8     | 5.8                                    | -7.6  | to | 19.1  |
| CC                         | 152 | -3.8                                    | -17.4    | to | 9.8     | 2.2                                   | -9.6  | to      | 14.0     | -3.6                                   | -16.2 | to | 9.0   |
| P interaction <sup>e</sup> |     |                                         |          |    | 0.807   |                                       |       |         | 0.409    |                                        |       |    | 0.912 |
| PON1-909                   |     |                                         |          |    |         |                                       |       |         |          |                                        |       |    |       |
| GG                         | 107 | -9.1                                    | -29.4    | to | 11.2    | 7.5                                   | -5.8  | to      | 20.9     | -12.1                                  | -31.1 | to | 7.0   |
| CG                         | 229 | 10.6                                    | -2.5     | to | 23.6    | 4.3                                   | -5.4  | to      | 13.9     | 9.3                                    | -3.2  | to | 21.8  |
| CC                         | 138 | -7.0                                    | -21.6    | to | 7.7     | 2.4                                   | -10.1 | to      | 15.0     | -6.7                                   | -20.3 | to | 6.8   |
| P interaction <sup>e</sup> |     |                                         |          |    | 0.706   |                                       |       |         | 0.439    |                                        |       |    | 0.928 |
| PON1-161                   |     |                                         |          |    |         |                                       |       |         |          |                                        |       |    |       |
| GG                         | 37  | -1.0                                    | -46.1    | to | 44.0    | -5.1                                  | -52.8 | to      | 42.6     | 2.9                                    | -35.5 | to | 41.2  |
| CG                         | 172 | -8.6                                    | -21.5    | to | 4.4     | 0.1                                   | -9.7  | to      | 9.8      | -9.0                                   | -21.1 | to | 3.2   |
| CC                         | 265 | 6.1                                     | -6.4     | to | 18.7    | 8.8                                   | -0.3  | to      | 17.8     | 3.8                                    | -8.1  | to | 15.7  |
| P interaction <sup>e</sup> |     |                                         |          |    | 0.233   |                                       |       |         | 0.141    |                                        |       |    | 0.368 |

a. Adjusted for child sex, maternal age, education (low, intermediate and high).

b. Total dialkyl phosphates is the sum of DEDTP, DETP, DEP, DMDTP, DMTP and DMP.

c. Diethyl alkyl phosphates is the sum of DEDTP, DETP and DEP.

d. Dimethyl alkyl phosphates is the sum of DMDTP, DMTP and DMP.

e. P-value based on interaction where the PON-1 type was treated as an ordinal variable.

**Table S16. Concentrations <LOD substituted with LOD/ $\sqrt{2}$ :** Difference in child nonverbal IQ test score at age 6 years (and 95% confidence interval) per log<sub>10</sub> nmol/g creatinine increase in maternal urine dialkyl phosphate metabolite concentration <sup>a</sup>, by timing of pregnancy urine sampling and degree of adjustment (N=708).

| Dialkyl Phosphate Type                  | Type of adjustment |                  |        |         |                                   |         |         |                                            |         |  |
|-----------------------------------------|--------------------|------------------|--------|---------|-----------------------------------|---------|---------|--------------------------------------------|---------|--|
|                                         | $\beta$            | None<br>(95% CI) |        | $\beta$ | Adjusted <sup>b</sup><br>(95% CI) |         | $\beta$ | Mutually adjusted <sup>c</sup><br>(95% CI) |         |  |
| Dialkyl phosphates (total) <sup>d</sup> |                    |                  |        |         |                                   |         |         |                                            |         |  |
| < 18 weeks' gestation                   | -0.6               | -4.1             | to 2.9 | -1.9    | -5.3                              | to 1.5  | -1.8    | -5.3                                       | to 1.7  |  |
| 18 – 25 weeks' gestation                | 3.2                | -0.6             | to 7.0 | 0.9     | -2.9                              | to 4.7  | 2.6     | -1.4                                       | to 6.7  |  |
| > 25 weeks' gestation                   | -0.8               | -4.5             | to 2.8 | -3.9    | -7.5                              | to -0.3 | -4.3    | -8.1                                       | to -0.6 |  |
| Mean of three urines                    | 0.6                | -4.4             | to 5.5 | -2.5    | -7.4                              | to 2.4  |         |                                            |         |  |
| Diethyl alkyl phosphates <sup>e</sup>   |                    |                  |        |         |                                   |         |         |                                            |         |  |
| < 18 weeks' gestation                   | 2.5                | -0.4             | to 5.5 | 0.5     | -2.4                              | to 3.4  | 0.5     | -2.5                                       | to 3.5  |  |
| 18 – 25 weeks' gestation                | 2.7                | -0.2             | to 5.7 | 0.4     | -2.5                              | to 3.3  | 0.4     | -2.7                                       | to 3.5  |  |
| > 25 weeks' gestation                   | 2.6                | -0.4             | to 5.5 | -0.3    | -3.3                              | to 2.6  | -0.5    | -3.5                                       | to 2.5  |  |
| Mean of three urines                    | 4.3                | 0.5              | to 8.2 | 1.0     | -2.9                              | to 4.8  |         |                                            |         |  |
| Dimethyl alkyl phosphates <sup>f</sup>  |                    |                  |        |         |                                   |         |         |                                            |         |  |
| < 18 weeks' gestation                   | -1.6               | -4.9             | to 1.8 | -2.4    | -5.7                              | to 0.8  | -2.3    | -5.7                                       | to 1.0  |  |
| 18 – 25 weeks' gestation                | 2.7                | -1.0             | to 6.4 | 0.7     | -2.9                              | to 4.3  | 2.4     | -1.4                                       | to 6.2  |  |
| > 25 weeks' gestation                   | -1.5               | -5.0             | to 1.9 | -4.1    | -7.5                              | to -0.6 | -4.3    | -7.9                                       | to -0.8 |  |
| Mean of three urines                    | -0.6               | -5.4             | to 4.1 | -3.0    | -7.7                              | to 1.7  |         |                                            |         |  |

a. Values below the limit of detection (LOD) substituted by the LOD/ $\sqrt{2}$ .

b. Adjusted for child sex, maternal age, ethnicity (Dutch, other-western, and non-western), education (low, intermediate, and high), income (low, middle, and high), marital status, maternal alcohol consumption (no alcohol consumption during pregnancy, alcohol consumption until pregnancy was known, occasional alcohol consumption during pregnancy, and frequent alcohol consumption during pregnancy), maternal non-verbal IQ, BMI categories (<18.5, 18.5-25, 25-30, and 30+), height of the mother, parity categories (0, 1, and 2+), IT-Home quartiles, and smoking categories (no smoking during pregnancy, smoked until pregnancy was known, and smoked during pregnancy).

c. Adjusted model with the inclusion of the three exposures in one model.

d. Total dialkyl phosphates is the sum of DEDTP, DETP, DEP, DMDTP, DMTP and DMP.

e. Diethyl alkyl phosphates is the sum of DEDTP, DETP and DEP.

f. Dimethyl alkyl phosphates is the sum of DMDTP, DMTP and DMP.

**Table S17. Creatinine adjustment as separate covariate:** Difference in child nonverbal IQ test score at age 6 years (and 95% confidence interval) per log<sub>10</sub> nmol/g creatinine increase in maternal urine dialkyl phosphate metabolite concentration, by timing of pregnancy urine sampling and degree of adjustment (N=708).

| Dialkyl Phosphate Type                         | Type of adjustment |             |                       |              |                                |              |
|------------------------------------------------|--------------------|-------------|-----------------------|--------------|--------------------------------|--------------|
|                                                | None <sup>a</sup>  |             | Adjusted <sup>b</sup> |              | Mutually adjusted <sup>c</sup> |              |
|                                                | β                  | (95% CI)    | β                     | (95% CI)     | β                              | (95% CI)     |
| <b>Dialkyl phosphates (total) <sup>d</sup></b> |                    |             |                       |              |                                |              |
| < 18 weeks' gestation                          | -1.8               | -5.1 to 1.5 | -2.4                  | -5.5 to 0.8  | -2.5                           | -5.7 to 0.7  |
| 18 – 25 weeks' gestation                       | 3.2                | -0.3 to 6.6 | 0.9                   | -2.5 to 4.3  | 2.7                            | -0.8 to 6.3  |
| > 25 weeks' gestation                          | -1.8               | -5.3 to 1.6 | -3.9                  | -7.3 to -0.5 | -4.5                           | -8.0 to -1.0 |
| Mean of three urines                           | -0.7               | -5.5 to 4.1 | -2.6                  | -7.3 to 2.1  |                                |              |
| <b>Diethyl alkyl phosphates <sup>e</sup></b>   |                    |             |                       |              |                                |              |
| < 18 weeks' gestation                          | -0.4               | -2.8 to 2.1 | -1.6                  | -4.0 to 0.9  | -1.6                           | -4.1 to 0.8  |
| 18 – 25 weeks' gestation                       | 2.3                | -0.1 to 4.8 | 0.6                   | -1.9 to 3.0  | 1.0                            | -1.5 to 3.5  |
| > 25 weeks' gestation                          | 1.6                | -0.9 to 4.1 | -0.5                  | -3.0 to 2.0  | -0.6                           | -3.1 to 2.0  |
| Mean of three urines                           | 3.0                | -0.6 to 6.7 | 0.5                   | -3.2 to 4.1  |                                |              |
| <b>Dimethyl alkyl phosphates <sup>f</sup></b>  |                    |             |                       |              |                                |              |
| < 18 weeks' gestation                          | -2.5               | -5.7 to 0.6 | -2.8                  | -5.8 to 0.2  | -2.9                           | -6.0 to 0.1  |
| 18 – 25 weeks' gestation                       | 2.7                | -0.6 to 6.1 | 0.7                   | -2.6 to 4.0  | 2.6                            | -0.8 to 6.0  |
| > 25 weeks' gestation                          | -2.4               | -5.7 to 0.9 | -4.0                  | -7.3 to -0.8 | -4.6                           | -7.9 to -1.3 |
| Mean of three urines                           | -1.9               | -6.6 to 2.7 | -3.3                  | -7.8 to 1.3  |                                |              |

a. "None" adjusted model is adjusted for creatinine concentrations.

b. Adjusted for creatinine concentrations, child sex, maternal age, ethnicity (Dutch, other-western, and non-western), education (low, intermediate, and high), income (low, middle, and high), marital status, maternal alcohol consumption (no alcohol consumption during pregnancy, alcohol consumption until pregnancy was known, occasional alcohol consumption during pregnancy, and frequent alcohol consumption during pregnancy), maternal non-verbal IQ, BMI categories (<18.5, 18.5-25, 25-30, and 30+), height of the mother, parity categories (0, 1, and 2+), IT-Home quartiles, and smoking categories (no smoking during pregnancy, smoked until pregnancy was known, and smoked during pregnancy).

c. Adjusted model with the inclusion of the three exposures in one model.

d. Total dialkyl phosphates is the sum of DEDTP, DETP, DEP, DMDTP, DMTP and DMP.

e. Diethyl alkyl phosphates is the sum of DEDTP, DETP and DEP.

f. Dimethyl alkyl phosphates is the sum of DMDTP, DMTP and DMP.

**Table S18. Removal of extreme values:** Difference in child nonverbal IQ test score at age 6 years (and 95% confidence interval) per log10 nmol/g creatinine increase in maternal urine dialkyl phosphate metabolite concentration, by timing of pregnancy urine sampling and degree of adjustment.

| Dialkyl Phosphate Type                         | Type of adjustment |             |                       |             |                                |             |
|------------------------------------------------|--------------------|-------------|-----------------------|-------------|--------------------------------|-------------|
|                                                | None               |             | Adjusted <sup>a</sup> |             | Mutually adjusted <sup>b</sup> |             |
|                                                | $\beta$            | (95% CI)    | $\beta$               | (95% CI)    | $\beta$                        | (95% CI)    |
| <b>Dialkyl phosphates (total) <sup>c</sup></b> |                    |             |                       |             |                                |             |
| < 18 weeks' gestation (n=639)                  | 1.2                | -2.1 to 4.4 | -0.5                  | -3.7 to 2.7 | -0.5                           | -3.6 to 2.7 |
| 18 – 25 weeks' gestation (n=638)               | 2.4                | -1.2 to 5.9 | 0.6                   | -2.9 to 4.2 | 2.9                            | -0.7 to 6.4 |
| > 25 weeks' gestation (n=640)                  | 0.3                | -3.0 to 3.7 | -2.8                  | -6.2 to 0.6 | -2.8                           | -6.2 to 0.6 |
| Mean of three urines (n=639)                   | 3.5                | -1.2 to 8.1 | 0.4                   | -4.4 to 5.1 |                                |             |
| <b>Diethyl alkyl phosphates <sup>d</sup></b>   |                    |             |                       |             |                                |             |
| < 18 weeks' gestation (n=638)                  | 2.1                | -0.7 to 4.9 | -0.2                  | -3.0 to 2.6 | 0.7                            | -2.0 to 3.4 |
| 18 – 25 weeks' gestation (n=639)               | 1.5                | -0.7 to 3.8 | 0.2                   | -2.0 to 2.5 | 0.0                            | -2.3 to 2.3 |
| > 25 weeks' gestation (n=640)                  | 1.8                | -0.4 to 4.1 | -0.3                  | -2.6 to 2.0 | -1.2                           | -3.5 to 1.0 |
| Mean of three urines (n=638)                   | 2.1                | -1.4 to 5.7 | -1.0                  | -4.7 to 2.6 |                                |             |
| <b>Dimethyl alkyl phosphates <sup>e</sup></b>  |                    |             |                       |             |                                |             |
| < 18 weeks' gestation (n=640)                  | 0.5                | -2.6 to 3.6 | -0.8                  | -3.8 to 2.3 | -0.9                           | -3.9 to 2.1 |
| 18 – 25 weeks' gestation (n=638)               | 1.8                | -1.6 to 5.2 | 0.5                   | -2.9 to 3.9 | 2.5                            | -0.9 to 5.9 |
| > 25 weeks' gestation (n=640)                  | -0.2               | -3.4 to 3.0 | -2.7                  | -6.0 to 0.5 | -2.9                           | -6.2 to 0.4 |
| Mean of three urines (n=638)                   | 2.3                | -2.2 to 6.8 | 0.0                   | -4.5 to 4.6 |                                |             |

a. Adjusted for child sex, maternal age, ethnicity (Dutch, other-western, and non-western), education (low, intermediate, and high), income (low, middle, and high), marital status, maternal alcohol consumption (no alcohol consumption during pregnancy, alcohol consumption until pregnancy was known, occasional alcohol consumption during pregnancy, and frequent alcohol consumption during pregnancy), maternal non-verbal IQ, BMI categories (<18.5, 18.5-25, 25-30, and 30+), height of the mother, parity categories (0, 1, and 2+), IT-Home quartiles, and smoking categories (no smoking during pregnancy, smoked until pregnancy was known, and smoked during pregnancy).

b. Adjusted model with the inclusion of the three exposures in one model.

c. Total dialkyl phosphates is the sum of DEDTP, DETP, DEP, DMDTP, DMTP and DMP.

d. Diethyl alkyl phosphates is the sum of DEDTP, DETP and DEP.

e. Dimethyl alkyl phosphates is the sum of DMDTP, DMTP and DMP.

**Table S19. Adjustment for prenatal fruit and vegetable consumption:** Difference in child nonverbal IQ test score at age 6 years (and 95% confidence interval) per log10 nmol/g creatinine increase in maternal urine dialkyl phosphate metabolite concentration, by timing of pregnancy urine sampling and degree of adjustment (N=708).

| Dialkyl Phosphate Type                  | Type of adjustment |                  |        |         |                                   |         |         |                                            |         |  |
|-----------------------------------------|--------------------|------------------|--------|---------|-----------------------------------|---------|---------|--------------------------------------------|---------|--|
|                                         | $\beta$            | None<br>(95% CI) |        | $\beta$ | Adjusted <sup>a</sup><br>(95% CI) |         | $\beta$ | Mutually adjusted <sup>b</sup><br>(95% CI) |         |  |
| Dialkyl phosphates (total) <sup>c</sup> |                    |                  |        |         |                                   |         |         |                                            |         |  |
| < 18 weeks' gestation                   | -0.7               | -4.1             | to 2.8 | -2.5    | -5.9                              | to 1.0  | -2.4    | -5.9                                       | to 1.2  |  |
| 18 – 25 weeks' gestation                | 3.2                | -0.6             | to 7.0 | 0.8     | -3.1                              | to 4.6  | 2.5     | -1.5                                       | to 6.6  |  |
| > 25 weeks' gestation                   | -0.8               | -4.4             | to 2.8 | -4.0    | -7.6                              | to -0.3 | -4.3    | -8.1                                       | to -0.5 |  |
| Mean of three urines                    | 0.6                | -4.3             | to 5.5 | -2.9    | -7.9                              | to 2.0  |         |                                            |         |  |
| Diethyl alkyl phosphates <sup>d</sup>   |                    |                  |        |         |                                   |         |         |                                            |         |  |
| < 18 weeks' gestation                   | 0.1                | -2.4             | to 2.6 | -1.6    | -4.1                              | to 0.9  | -1.7    | -4.3                                       | to 0.8  |  |
| 18 – 25 weeks' gestation                | 2.1                | -0.4             | to 4.7 | 0.5     | -2.0                              | to 3.0  | 0.9     | -1.7                                       | to 3.5  |  |
| > 25 weeks' gestation                   | 2.2                | -0.3             | to 4.7 | -0.1    | -2.7                              | to 2.4  | -0.1    | -2.8                                       | to 2.5  |  |
| Mean of three urines                    | 4.4                | 0.6              | to 8.2 | 0.9     | -3.0                              | to 4.8  |         |                                            |         |  |
| Dimethyl alkyl phosphates <sup>e</sup>  |                    |                  |        |         |                                   |         |         |                                            |         |  |
| < 18 weeks' gestation                   | -1.6               | -4.9             | to 1.7 | -3.1    | -6.3                              | to 0.2  | -2.9    | -6.2                                       | to 0.4  |  |
| 18 – 25 weeks' gestation                | 2.6                | -1.0             | to 6.3 | 0.5     | -3.2                              | to 4.1  | 2.2     | -1.6                                       | to 6.0  |  |
| > 25 weeks' gestation                   | -1.6               | -5.0             | to 1.9 | -4.2    | -7.6                              | to -0.7 | -4.3    | -7.9                                       | to -0.8 |  |
| Mean of three urines                    | -0.6               | -5.4             | to 4.1 | -3.5    | -8.3                              | to 1.3  |         |                                            |         |  |

a. Adjusted for child sex, maternal age, ethnicity (Dutch, other-western, and non-western), education (low, intermediate, and high), income (low, middle, and high), marital status, maternal alcohol consumption (no alcohol consumption during pregnancy, alcohol consumption until pregnancy was known, occasional alcohol consumption during pregnancy, and frequent alcohol consumption during pregnancy), maternal non-verbal IQ, BMI categories (<18.5, 18.5-25, 25-30, and 30+), height of the mother, parity categories (0, 1, and 2+), IT-Home quartiles, smoking categories (no smoking during pregnancy, smoked until pregnancy was known, and smoked during pregnancy), fruit consumption in grams, vegetables consumption in grams, and energy intake in kcal.

b. Adjusted model with the inclusion of the three exposures in one model.

c. Total dialkyl phosphates is the sum of DEDTP, DETP, DEP, DMDTP, DMTP and DMP.

d. Diethyl alkyl phosphates is the sum of DEDTP, DETP and DEP.

e. Dimethyl alkyl phosphates is the sum of DMDTP, DMTP and DMP.

**Table S20. Multiple informants model:** Difference in child nonverbal IQ test score at age 6 years (and 95% confidence interval) per log10 nmol/g creatinine increase in maternal urine dialkyl phosphate metabolite concentration, by timing of pregnancy urine sampling (N=708).

| Dialkyl Phosphate Type                  | Estimates based on the multiple informants approach <sup>a</sup> |              |       |
|-----------------------------------------|------------------------------------------------------------------|--------------|-------|
|                                         | $\beta$                                                          | (95% CI)     |       |
| Dialkyl phosphates (total) <sup>b</sup> |                                                                  |              |       |
| < 18 weeks' gestation                   | -2.0                                                             | -5.3 to 1.4  |       |
| 18 – 25 weeks' gestation                | 0.8                                                              | -2.9 to 4.5  |       |
| > 25 weeks' gestation                   | -4.0                                                             | -7.5 to -0.4 |       |
| p homogeneity <sup>c</sup>              |                                                                  |              | 0.049 |
| Diethyl alkyl phosphates <sup>d</sup>   |                                                                  |              |       |
| < 18 weeks' gestation                   | -1.4                                                             | -3.9 to 1.0  |       |
| 18 – 25 weeks' gestation                | 0.6                                                              | -1.9 to 3.0  |       |
| > 25 weeks' gestation                   | -0.2                                                             | -2.7 to 2.3  |       |
| p homogeneity <sup>c</sup>              |                                                                  |              | 0.722 |
| Dimethyl alkyl phosphates <sup>e</sup>  |                                                                  |              |       |
| < 18 weeks' gestation                   | -2.5                                                             | -5.7 to 0.6  |       |
| 18 – 25 weeks' gestation                | 0.6                                                              | -3.0 to 4.1  |       |
| > 25 weeks' gestation                   | -4.2                                                             | -7.5 to -0.8 |       |
| p homogeneity <sup>c</sup>              |                                                                  |              | 0.020 |

a. Adjusted for child sex, maternal age, ethnicity (Dutch, other-western, and non-western), education (low, intermediate, and high), income (low, middle, and high), marital status, maternal alcohol consumption (no alcohol consumption during pregnancy, alcohol consumption until pregnancy was known, occasional alcohol consumption during pregnancy, and frequent alcohol consumption during pregnancy), maternal non-verbal IQ, BMI categories (<18.5, 18.5-25, 25-30, and 30+), height of the mother, parity categories (0, 1, and 2+), IT-Home quartiles, and smoking categories (no smoking during pregnancy, smoked until pregnancy was known, and smoked during pregnancy).

b. Total dialkyl phosphates is the sum of DEDTP, DETP, DEP, DMDTP, DMTP and DMP.

c. Tests whether the exposure from different time points relates in the same manner to non-verbal IQ scores.

d. Diethyl alkyl phosphates is the sum of DEDTP, DETP and DEP.

e. Dimethyl alkyl phosphates is the sum of DMDTP, DMTP and DMP.



**Table S21. Effect measure modification by maternal education:** Difference in child nonverbal IQ test score at age 6 years (and 95% confidence interval) per log10 nmol/g creatinine increase in maternal urine dialkyl phosphate metabolite concentration, by timing of pregnancy urine sampling, degree of adjustment, and **maternal education level** (N=708).

| Total Dialkyl phosphates <sup>a</sup> | Educational level |               |        |               |      |               | P interaction |
|---------------------------------------|-------------------|---------------|--------|---------------|------|---------------|---------------|
|                                       | High              |               | Middle |               | Low  |               |               |
| Type of adjustment                    | B                 | 95%CI         | B      | 95%CI         | B    | 95%CI         |               |
| None                                  |                   |               |        |               |      |               |               |
| < 18 weeks' gestation                 | 0.0               | -5.0 to 5.0   | -6.1   | -12.1 to -0.2 | 1.0  | -6.8 to 8.9   | 0.836         |
| 18 – 25 weeks' gestation              | 2.0               | -3.4 to 7.3   | -1.4   | -8.1 to 5.2   | 2.3  | -6.5 to 11.0  | 0.796         |
| > 25 weeks' gestation                 | -6.1              | -11.2 to -1.0 | -1.3   | -7.4 to 4.8   | -1.8 | -10.2 to 6.6  | 0.341         |
| Mean of three urines                  | -2.7              | -9.8 to 4.5   | -4.8   | -13.2 to 3.5  | 1.2  | -10.0 to 12.3 | 0.745         |
| Adjusted <sup>b</sup>                 |                   |               |        |               |      |               |               |
| < 18 weeks' gestation                 | -1.2              | -6.3 to 3.9   | -7.3   | -13.7 to -0.9 | 2.7  | -6.7 to 12.1  | 0.675         |
| 18 – 25 weeks' gestation              | 1.3               | -4.1 to 6.7   | -1.1   | -8.4 to 6.1   | 1.8  | -9.3 to 12.8  | 0.944         |
| > 25 weeks' gestation                 | -5.8              | -11.0 to -0.7 | -3.9   | -10.6 to 2.8  | -0.2 | -10.6 to 10.2 | 0.241         |
| Mean of three urines                  | -3.5              | -10.8 to 3.9  | -7.3   | -16.5 to 1.9  | 3.4  | -10.4 to 17.1 | 0.398         |
| Mutually adjusted <sup>c</sup>        |                   |               |        |               |      |               |               |
| < 18 weeks' gestation                 | -0.9              | -6.1 to 4.3   | -7.2   | -13.8 to -0.7 | 2.5  | -7.6 to 12.7  | 0.700         |
| 18 – 25 weeks' gestation              | 3.3               | -2.3 to 8.9   | 1.7    | -6.0 to 9.3   | 0.9  | -11.3 to 13.2 | 0.986         |
| > 25 weeks' gestation                 | -6.5              | -11.9 to -1.2 | -3.5   | -10.5 to 3.4  | -0.8 | -11.8 to 10.1 | 0.257         |

a. Total dialkyl phosphates is the sum of DEDTP, DETP, DEP, DMDTP, DMTP and DMP.

b. Adjusted for child sex, maternal age, ethnicity (Dutch, other-western, and non-western), income (low, middle, and high), marital status, maternal alcohol consumption (no alcohol consumption during pregnancy, alcohol consumption until pregnancy was known, occasional alcohol consumption during pregnancy, and frequent alcohol consumption during pregnancy), maternal non-verbal IQ, BMI categories (<18.5, 18.5-25, 25-30, and 30+), height of the mother, parity categories (0, 1, and 2+), Home IT quartiles, and smoking categories (no smoking during pregnancy, smoked until pregnancy was known, and smoked during pregnancy).

c. Adjusted model with the inclusion of the three exposures in one model.

**Table S22. Effect measure modification by child sex:** Difference in child nonverbal IQ test score at age 6 years (and 95% confidence interval) per log<sub>10</sub> nmol/g creatinine increase in maternal urine dialkyl phosphate metabolite concentration, by timing of pregnancy urine sampling, degree of adjustment, and **child sex** (N=708).

| Dialkyl phosphates (total) <sup>a</sup> | Child sex |             |       |               | P interaction |
|-----------------------------------------|-----------|-------------|-------|---------------|---------------|
|                                         | Boys      |             | Girls |               |               |
| Type of adjustment                      | B         | 95%CI       | B     | 95%CI         |               |
| None                                    |           |             |       |               |               |
| < 18 weeks' gestation                   | -0.4      | -5.5 to 4.7 | -1.1  | -5.9 to 3.6   | 0.844         |
| 18 – 25 weeks' gestation                | 1.9       | -3.6 to 7.3 | 4.5   | -0.8 to 9.8   | 0.499         |
| > 25 weeks' gestation                   | 0.0       | -5.4 to 5.4 | -1.7  | -6.5 to 3.1   | 0.651         |
| Mean of three urines                    | 0.5       | -6.6 to 7.6 | 0.3   | -6.4 to 7.1   | 0.976         |
| Adjusted <sup>b</sup>                   |           |             |       |               |               |
| < 18 weeks' gestation                   | -2.0      | -7.2 to 3.2 | -1.8  | -6.3 to 2.8   | 0.840         |
| 18 – 25 weeks' gestation                | -0.3      | -5.9 to 5.2 | 2.1   | -3.3 to 7.4   | 0.619         |
| > 25 weeks' gestation                   | -3.0      | -8.5 to 2.4 | -5.3  | -10.2 to -0.3 | 0.626         |
| Mean of three urines                    | -2.6      | -9.9 to 4.7 | -2.7  | -9.5 to 4.2   | 0.979         |
| Mutually adjusted <sup>c</sup>          |           |             |       |               |               |
| < 18 weeks' gestation                   | -1.8      | -7.3 to 3.7 | -1.6  | -6.2 to 3.0   | 0.751         |
| 18 – 25 weeks' gestation                | 0.9       | -5.0 to 6.8 | 4.6   | -1.0 to 10.2  | 0.550         |
| > 25 weeks' gestation                   | -3.0      | -8.6 to 2.7 | -6.5  | -11.7 to -1.3 | 0.566         |

a. Total dialkyl phosphates is the sum of DEDTP, DETP, DEP, DMDTP, DMTP and DMP.

b. Adjusted for maternal age, ethnicity categories (Dutch, other-western, and non-western), education (low, intermediate, and high), income (low, middle, and high), marital status, maternal alcohol consumption (no alcohol consumption during pregnancy, alcohol consumption until pregnancy was known, occasional alcohol consumption during pregnancy, and frequent alcohol consumption during pregnancy), maternal non-verbal IQ, BMI categories (<18.5, 18.5-25, 25-30, and 30+), height of the mother, parity categories (0, 1, and 2+), Home IT quartiles, and smoking categories (no smoking during pregnancy, smoked until pregnancy was known, and smoked during pregnancy).

c. Adjusted model with the inclusion of the three exposures in one model.

**Table S23. Complete-case only model (with the exclusion of IT-Home score):** Difference in child nonverbal IQ test score at age 6 years (and 95% confidence interval) per log<sub>10</sub> nmol/g creatinine increase in maternal urine dialkyl phosphate metabolite concentration, by timing of pregnancy urine sampling, and degree of adjustment, among mother-child pairs with complete covariate data.

| Dialkyl Phosphate Type                  | Type of adjustment |          |        |                               |          |         |                                        |          |         |  |
|-----------------------------------------|--------------------|----------|--------|-------------------------------|----------|---------|----------------------------------------|----------|---------|--|
|                                         | None (n=708)       |          |        | Adjusted (n=541) <sup>a</sup> |          |         | Mutually adjusted (n=541) <sup>b</sup> |          |         |  |
|                                         | β                  | (95% CI) |        | β                             | (95% CI) |         | β                                      | (95% CI) |         |  |
| Dialkyl phosphates (total) <sup>c</sup> |                    |          |        |                               |          |         |                                        |          |         |  |
| < 18 weeks' gestation                   | -0.7               | -4.2     | to 2.8 | -2.3                          | -6.1     | to 1.5  | -2.3                                   | -6.2     | to 1.6  |  |
| 18 – 25 weeks' gestation                | 3.2                | -0.6     | to 7.0 | 1.1                           | -3.3     | to 5.4  | 2.7                                    | -1.8     | to 7.2  |  |
| > 25 weeks' gestation                   | -0.9               | -4.5     | to 2.7 | -3.9                          | -8.1     | to 0.4  | -4.2                                   | -8.6     | to 0.2  |  |
| Mean of three urines                    | 0.6                | -4.4     | to 5.5 | -2.5                          | -8.1     | to 3.2  |                                        |          |         |  |
| Diethyl alkyl phosphates <sup>d</sup>   |                    |          |        |                               |          |         |                                        |          |         |  |
| < 18 weeks' gestation                   | 0.1                | -2.4     | to 2.6 | -2.0                          | -4.6     | to 0.6  | -2.2                                   | -4.9     | to 0.5  |  |
| 18 – 25 weeks' gestation                | 2.2                | -0.4     | to 4.7 | 1.1                           | -1.7     | to 3.8  | 1.3                                    | -1.5     | to 4.2  |  |
| > 25 weeks' gestation                   | 2.2                | -0.3     | to 4.7 | 0.4                           | -2.9     | to 3.7  | 0.4                                    | -2.9     | to 3.8  |  |
| Mean of three urines                    | 0.6                | -4.4     | to 5.5 | 1.4                           | -2.9     | to 5.8  |                                        |          |         |  |
| Dimethyl alkyl phosphates <sup>e</sup>  |                    |          |        |                               |          |         |                                        |          |         |  |
| < 18 weeks' gestation                   | -1.7               | -5.0     | to 1.6 | -2.6                          | -6.3     | to 1.0  | -2.6                                   | -6.2     | to 1.1  |  |
| 18 – 25 weeks' gestation                | 2.6                | -1.0     | to 6.3 | 0.5                           | -3.6     | to 4.6  | 2.1                                    | -2.2     | to 6.4  |  |
| > 25 weeks' gestation                   | -1.6               | -5.1     | to 1.8 | -4.3                          | -8.3     | to -0.3 | -4.5                                   | -8.6     | to -0.4 |  |
| Mean of three urines                    | 0.6                | -4.4     | to 5.5 | -3.1                          | -8.6     | to 2.3  |                                        |          |         |  |

a. Adjusted for child sex, maternal age, ethnicity (Dutch, other-western, and non-western), education (low, intermediate, and high), income (low, middle, and high), marital status, maternal non-verbal IQ, maternal alcohol consumption (no alcohol consumption during pregnancy, alcohol consumption until pregnancy was known, occasional alcohol consumption during pregnancy, and frequent alcohol consumption during pregnancy), BMI categories (<18.5, 18.5-25, 25-30, and 30+), height of the mother, parity categories (0, 1, and 2+), and smoking categories (no smoking during pregnancy, smoked until pregnancy was known, and smoked during pregnancy).

b. Adjusted model with the inclusion of the three exposures in one model.

c. Total dialkyl phosphates is the sum of DEDTP, DETP, DEP, DMDTP, DMTP and DMP.

d. Diethyl alkyl phosphates is the sum of DEDTP, DETP and DEP.

e. Dimethyl alkyl phosphates is the sum of DMDTP, DMTP and DMP.

**Table S24. Complete-case only model (with the inclusion of IT-Home score):** Difference in child nonverbal IQ test score at age 6 years (and 95% confidence interval) per log<sub>10</sub> nmol/g creatinine increase in maternal urine dialkyl phosphate metabolite concentration, by timing of pregnancy urine sampling, and degree of adjustment, among mother-child pairs with complete covariate data.

| Dialkyl Phosphate Type                        | Type of adjustment |             |                               |             |                                        |             |
|-----------------------------------------------|--------------------|-------------|-------------------------------|-------------|----------------------------------------|-------------|
|                                               | None (n=708)       |             | Adjusted (n=384) <sup>a</sup> |             | Mutually adjusted (n=384) <sup>b</sup> |             |
|                                               | β                  | (95% CI)    | β                             | (95% CI)    | β                                      | (95% CI)    |
| <b>Dialkyl phosphates (total)<sup>c</sup></b> |                    |             |                               |             |                                        |             |
| < 18 weeks' gestation                         | -0.7               | -4.2 to 2.8 | -0.5                          | -5.1 to 4.0 | -1.0                                   | -5.7 to 3.6 |
| 18 – 25 weeks' gestation                      | 3.2                | -0.6 to 7.0 | 3.3                           | -1.7 to 8.4 | 4.4                                    | -0.9 to 9.6 |
| > 25 weeks' gestation                         | -0.9               | -4.5 to 2.7 | -2.5                          | -7.4 to 2.4 | -3.4                                   | -8.4 to 1.6 |
| Mean of three urines                          | 0.6                | -4.4 to 5.5 | 0.9                           | -5.8 to 7.5 |                                        |             |
| <b>Diethyl alkyl phosphates<sup>d</sup></b>   |                    |             |                               |             |                                        |             |
| < 18 weeks' gestation                         | 0.1                | -2.4 to 2.6 | -1.7                          | -4.6 to 1.3 | -1.9                                   | -4.8 to 1.1 |
| 18 – 25 weeks' gestation                      | 2.2                | -0.4 to 4.7 | 1.7                           | -1.5 to 4.8 | 1.9                                    | -1.3 to 5.1 |
| > 25 weeks' gestation                         | 2.2                | -0.3 to 4.7 | 0.1                           | -3.7 to 4.0 | -0.1                                   | -4.0 to 3.8 |
| Mean of three urines                          | 0.6                | -4.4 to 5.5 | 0.9                           | -5.8 to 7.5 |                                        |             |
| <b>Dimethyl alkyl phosphates<sup>e</sup></b>  |                    |             |                               |             |                                        |             |
| < 18 weeks' gestation                         | -1.7               | -5.0 to 1.6 | -1.1                          | -5.5 to 3.4 | -1.3                                   | -5.8 to 3.1 |
| 18 – 25 weeks' gestation                      | 2.6                | -1.0 to 6.3 | 2.7                           | -2.2 to 7.5 | 3.6                                    | -1.4 to 8.6 |
| > 25 weeks' gestation                         | -1.6               | -5.1 to 1.8 | -2.7                          | -7.3 to 2.0 | -3.3                                   | -8.1 to 1.5 |
| Mean of three urines                          | 0.6                | -4.4 to 5.5 | 0.9                           | -5.8 to 7.5 |                                        |             |

a. Adjusted for child sex, maternal age, ethnicity (Dutch, other-western, and non-western), education (low, intermediate, and high), income (low, middle, and high), marital status, maternal non-verbal IQ, maternal alcohol consumption (no alcohol consumption during pregnancy, alcohol consumption until pregnancy was known, occasional alcohol consumption during pregnancy, and frequent alcohol consumption during pregnancy), BMI categories (<18.5, 18.5-25, 25-30, and 30+), height of the mother, parity categories (0, 1, and 2+), IT-Home quartiles, and smoking categories (no smoking during pregnancy, smoked until pregnancy was known, and smoked during pregnancy).

b. Adjusted model with the inclusion of the three exposures in one model.

c. Total dialkyl phosphates is the sum of DEDTP, DETP, DEP, DMDTP, DMTP and DMP.

d. Diethyl alkyl phosphates is the sum of DEDTP, DETP and DEP.

e. Dimethyl alkyl phosphates is the sum of DMDTP, DMTP and DMP.

**Table S25. Excluding DEDTP (i.e., including only those metabolites with at least 80% of values >LOD):** Difference in child nonverbal IQ test score at age 6 years (and 95% confidence interval) per log10 nmol/g creatinine increase in maternal urine dialkyl phosphate metabolite concentration, by timing of pregnancy urine sampling and degree of adjustment (N=708).

| Dialkyl Phosphate Type                  | Type of adjustment |                  |        |         |                                   |         |         |                                            |         |  |
|-----------------------------------------|--------------------|------------------|--------|---------|-----------------------------------|---------|---------|--------------------------------------------|---------|--|
|                                         | $\beta$            | None<br>(95% CI) |        | $\beta$ | Adjusted <sup>a</sup><br>(95% CI) |         | $\beta$ | Mutually adjusted <sup>b</sup><br>(95% CI) |         |  |
| Dialkyl phosphates (total) <sup>c</sup> |                    |                  |        |         |                                   |         |         |                                            |         |  |
| < 18 weeks' gestation                   | -0.7               | -4.2             | to 2.8 | -1.9    | -5.3                              | to 1.5  | -1.9    | -5.3                                       | to 1.6  |  |
| 18 – 25 weeks' gestation                | 3.2                | -0.6             | to 7.0 | 0.9     | -2.9                              | to 4.7  | 2.6     | -1.4                                       | to 6.6  |  |
| > 25 weeks' gestation                   | -0.8               | -4.4             | to 2.8 | -3.9    | -7.5                              | to -0.3 | -4.3    | -8.1                                       | to -0.6 |  |
| Mean of three urines                    | 0.6                | -4.3             | to 5.5 | -2.5    | -7.4                              | to 2.4  |         |                                            |         |  |
| Diethyl alkyl phosphates <sup>d</sup>   |                    |                  |        |         |                                   |         |         |                                            |         |  |
| < 18 weeks' gestation                   | 0.1                | -2.4             | to 2.6 | -1.4    | -3.9                              | to 1.0  | -1.6    | -4.1                                       | to 0.9  |  |
| 18 – 25 weeks' gestation                | 2.1                | -0.4             | to 4.6 | 0.5     | -2.0                              | to 3.0  | 0.9     | -1.7                                       | to 3.4  |  |
| > 25 weeks' gestation                   | 2.2                | -0.3             | to 4.7 | -0.2    | -2.8                              | to 2.3  | -0.3    | -2.8                                       | to 2.3  |  |
| Mean of three urines                    | 4.4                | 0.6              | to 8.2 | 1.0     | -2.8                              | to 4.9  |         |                                            |         |  |
| Dimethyl alkyl phosphates <sup>e</sup>  |                    |                  |        |         |                                   |         |         |                                            |         |  |
| < 18 weeks' gestation                   | -1.6               | -4.9             | to 1.7 | -2.5    | -5.7                              | to 0.7  | -2.3    | -5.6                                       | to 0.9  |  |
| 18 – 25 weeks' gestation                | 2.6                | -1.0             | to 6.3 | 0.7     | -3.0                              | to 4.3  | 2.3     | -1.4                                       | to 6.1  |  |
| > 25 weeks' gestation                   | -1.6               | -5.0             | to 1.9 | -4.1    | -7.5                              | to -0.7 | -4.3    | -7.9                                       | to -0.8 |  |
| Mean of three urines                    | -0.6               | -5.4             | to 4.1 | -3.0    | -7.7                              | to 1.7  |         |                                            |         |  |

a. Adjusted for child sex, maternal age, ethnicity (Dutch, other-western, and non-western), education (low, intermediate, and high), income (low, middle, and high), marital status, maternal alcohol consumption (no alcohol consumption during pregnancy, alcohol consumption until pregnancy was known, occasional alcohol consumption during pregnancy, and frequent alcohol consumption during pregnancy), maternal non-verbal IQ, BMI categories (<18.5, 18.5-25, 25-30, and 30+), height of the mother, parity categories (0, 1, and 2+), IT-Home quartiles, and smoking categories (no smoking during pregnancy, smoked until pregnancy was known, and smoked during pregnancy).

b. Adjusted model with the inclusion of the three exposures in one model.

c. Total dialkyl phosphates is the sum of DETP, DEP, DMDTP, DMTP and DMP.

d. Diethyl alkyl phosphates is the sum of DETP and DEP.

e. Dimethyl alkyl phosphates is the sum of DMDTP, DMTP and DMP.

**Table S26.** Difference in **Mosaics** test score at age 6 years (and 95% confidence interval) per log10 nmol/g creatinine increase in maternal urine dialkyl phosphate metabolite concentration, by timing of pregnancy urine sampling and degree of adjustment (N=708).

| Dialkyl Phosphate Type                         | $\beta$ | Type of adjustment |        |                       |      |                                |      |      |         |
|------------------------------------------------|---------|--------------------|--------|-----------------------|------|--------------------------------|------|------|---------|
|                                                |         | None               |        | Adjusted <sup>a</sup> |      | Mutually adjusted <sup>b</sup> |      |      |         |
|                                                |         | (95% CI)           |        | (95% CI)              |      | (95% CI)                       |      |      |         |
| <b>Dialkyl phosphates (total) <sup>c</sup></b> |         |                    |        |                       |      |                                |      |      |         |
| < 18 weeks' gestation                          | -1.3    | -4.9               | to 2.3 | -3.1                  | -6.5 | to 0.4                         | -3.0 | -6.6 | to 0.6  |
| 18 – 25 weeks' gestation                       | 2.7     | -1.2               | to 6.7 | 0.1                   | -3.7 | to 4.0                         | 1.8  | -2.3 | to 5.9  |
| > 25 weeks' gestation                          | 0.2     | -3.6               | to 3.9 | -3.3                  | -7.0 | to 0.4                         | -3.3 | -7.2 | to 0.5  |
| Mean of three urines                           | 0.5     | -4.7               | to 5.6 | -3.4                  | -8.5 | to 1.6                         |      |      |         |
| p homogeneity <sup>d</sup>                     |         |                    |        |                       |      |                                |      |      | 0.110   |
| <b>Diethyl alkyl phosphates <sup>e</sup></b>   |         |                    |        |                       |      |                                |      |      |         |
| < 18 weeks' gestation                          | 0.5     | -2.1               | to 3.2 | -1.2                  | -3.7 | to 1.3                         | -1.5 | -4.1 | to 1.1  |
| 18 – 25 weeks' gestation                       | 2.8     | 0.1                | to 5.4 | 1.0                   | -1.5 | to 3.6                         | 1.2  | -1.5 | to 3.8  |
| > 25 weeks' gestation                          | 3.7     | 1.0                | to 6.3 | 0.9                   | -1.7 | to 3.4                         | 0.8  | -1.9 | to 3.4  |
| Mean of three urines                           | 5.7     | 1.7                | to 9.6 | 1.6                   | -2.3 | to 5.6                         |      |      |         |
| p homogeneity <sup>d</sup>                     |         |                    |        |                       |      |                                |      |      | 0.457   |
| <b>Dimethyl alkyl phosphates <sup>f</sup></b>  |         |                    |        |                       |      |                                |      |      |         |
| < 18 weeks' gestation                          | -2.2    | -5.6               | to 1.3 | -3.6                  | -6.9 | to -0.3                        | -3.4 | -6.7 | to 0.0  |
| 18 – 25 weeks' gestation                       | 2.2     | -1.6               | to 6.1 | 0.0                   | -3.7 | to 3.7                         | 1.8  | -2.0 | to 5.7  |
| > 25 weeks' gestation                          | -1.1    | -4.7               | to 2.5 | -3.9                  | -7.4 | to -0.4                        | -3.9 | -7.6 | to -0.3 |
| Mean of three urines                           | -1.1    | -6.0               | to 3.9 | -4.1                  | -9.0 | to 0.7                         |      |      |         |
| p homogeneity <sup>d</sup>                     |         |                    |        |                       |      |                                |      |      | 0.039   |

a. Adjusted for child sex, maternal age, ethnicity (Dutch, other-western and non-western), education (low, intermediate, and high), income (low, middle, and high), marital status, maternal alcohol consumption (no alcohol consumption during pregnancy, alcohol consumption until pregnancy was known, occasional alcohol consumption during pregnancy, and frequent alcohol consumption during pregnancy), maternal non-verbal IQ, BMI categories (<18.5, 18.5-25, 25-30, and 30+), height of the mother, parity categories (0, 1, and 2+), IT-Home quartiles, and smoking categories (no smoking during pregnancy, smoked until pregnancy was known, and smoked during pregnancy).

b. Adjusted model with the inclusion of the three exposures in one model.

c. Total dialkyl phosphates is the sum of DEDTP, DETP, DEP, DMDTP, DMTP and DMP.

d. Multiple-partial F test used to test whether exposure from different time points relates in the same manner to Mosaics scores.

e. Diethyl alkyl phosphates is the sum of DEDTP, DETP and DEP.

f. Dimethyl alkyl phosphates is the sum of DMDTP, DMTP and DMP.

**Table S27.** Difference in **Categories** test score at age 6 years (and 95% confidence interval) per log<sub>10</sub> nmol/g creatinine increase in maternal urine dialkyl phosphate metabolite concentration, by timing of pregnancy urine sampling and degree of adjustment (N=708).

| Dialkyl Phosphate Type                        | β    | Type of adjustment |        |                       |      |                                |      |      |        |
|-----------------------------------------------|------|--------------------|--------|-----------------------|------|--------------------------------|------|------|--------|
|                                               |      | None               |        | Adjusted <sup>a</sup> |      | Mutually adjusted <sup>b</sup> |      |      |        |
|                                               |      | (95% CI)           |        | (95% CI)              |      | (95% CI)                       |      |      |        |
| <b>Dialkyl phosphates (total)<sup>c</sup></b> |      |                    |        |                       |      |                                |      |      |        |
| < 18 weeks' gestation                         | 0.6  | -2.9               | to 4.1 | 0.6                   | -2.9 | to 4.2                         | 0.4  | -3.3 | to 4.1 |
| 18 – 25 weeks' gestation                      | 3.0  | -0.8               | to 6.8 | 2.4                   | -1.5 | to 6.3                         | 3.3  | -0.9 | to 7.4 |
| > 25 weeks' gestation                         | -1.4 | -4.9               | to 2.2 | -2.4                  | -6.1 | to 1.4                         | -3.3 | -7.2 | to 0.6 |
| Mean of three urines                          | 1.2  | -3.7               | to 6.1 | 0.9                   | -4.2 | to 6.0                         |      |      |        |
| p homogeneity <sup>d</sup>                    |      |                    |        |                       |      |                                |      |      | 0.128  |
| <b>Diethyl alkyl phosphates<sup>e</sup></b>   |      |                    |        |                       |      |                                |      |      |        |
| < 18 weeks' gestation                         | -0.5 | -3.0               | to 2.1 | -1.0                  | -3.6 | to 1.5                         | -1.1 | -3.7 | to 1.5 |
| 18 – 25 weeks' gestation                      | 1.1  | -1.5               | to 3.6 | 0.4                   | -2.2 | to 3.0                         | 0.8  | -1.9 | to 3.5 |
| > 25 weeks' gestation                         | 0.0  | -2.6               | to 2.5 | -0.9                  | -3.6 | to 1.7                         | -1.0 | -3.7 | to 1.7 |
| Mean of three urines                          | 1.7  | -2.2               | to 5.5 | 0.6                   | -3.4 | to 4.6                         |      |      |        |
| p homogeneity <sup>d</sup>                    |      |                    |        |                       |      |                                |      |      | 0.520  |
| <b>Dimethyl alkyl phosphates<sup>f</sup></b>  |      |                    |        |                       |      |                                |      |      |        |
| < 18 weeks' gestation                         | -0.1 | -3.4               | to 3.2 | 0.2                   | -3.2 | to 3.5                         | 0.1  | -3.4 | to 3.5 |
| 18 – 25 weeks' gestation                      | 2.6  | -1.0               | to 6.3 | 2.0                   | -1.8 | to 5.8                         | 2.8  | -1.2 | to 6.7 |
| > 25 weeks' gestation                         | -1.3 | -4.8               | to 2.1 | -2.1                  | -5.7 | to 1.5                         | -2.8 | -6.5 | to 0.9 |
| Mean of three urines                          | 0.8  | -3.9               | to 5.5 | 0.8                   | -4.1 | to 5.7                         |      |      |        |
| p homogeneity <sup>d</sup>                    |      |                    |        |                       |      |                                |      |      | 0.200  |

a. Adjusted for child sex, maternal age, ethnicity (Dutch, other-western and non-western), education (low, intermediate, and high), income (low, middle, and high), marital status, maternal alcohol consumption (no alcohol consumption during pregnancy, alcohol consumption until pregnancy was known, occasional alcohol consumption during pregnancy, and frequent alcohol consumption during pregnancy), maternal non-verbal IQ, BMI categories (<18.5, 18.5-25, 25-30, and 30+), height of the mother, parity categories (0, 1, and 2+), IT-Home quartiles, and smoking categories (no smoking during pregnancy, smoked until pregnancy was known, and smoked during pregnancy).

b. Adjusted model with the inclusion of the three exposures in one model.

c. Total dialkyl phosphates is the sum of DEDTP, DETP, DEP, DMDTP, DMTP and DMP.

d. Multiple-partial F test used to test whether exposure from different time points relates in the same manner to Categories scores.

e. Diethyl alkyl phosphates is the sum of DEDTP, DETP and DEP.

f. Dimethyl alkyl phosphates is the sum of DMDTP, DMTP and DMP.

**Figure S1. Restricted cubic spline (and 95% confidence interval) of adjusted child nonverbal IQ scores and (untransformed) total dialkyl phosphate concentrations, by timing of pregnancy urine sampling (n=708).** Adjusted for child sex, maternal age, ethnicity

(Dutch, other-western, and non-western), education (low, intermediate, and high), income (low, middle, and high), marital status, maternal alcohol consumption (no alcohol consumption during pregnancy, alcohol consumption until pregnancy was known, occasional alcohol consumption during pregnancy, and frequent alcohol consumption during pregnancy), maternal non-verbal IQ, BMI categories (<18.5, 18.5-25, 25-30, and 30+), height of the mother, parity categories (0, 1, and 2+), IT-Home quartiles, and smoking categories (no smoking during pregnancy, smoked until pregnancy was known, and smoked during pregnancy).

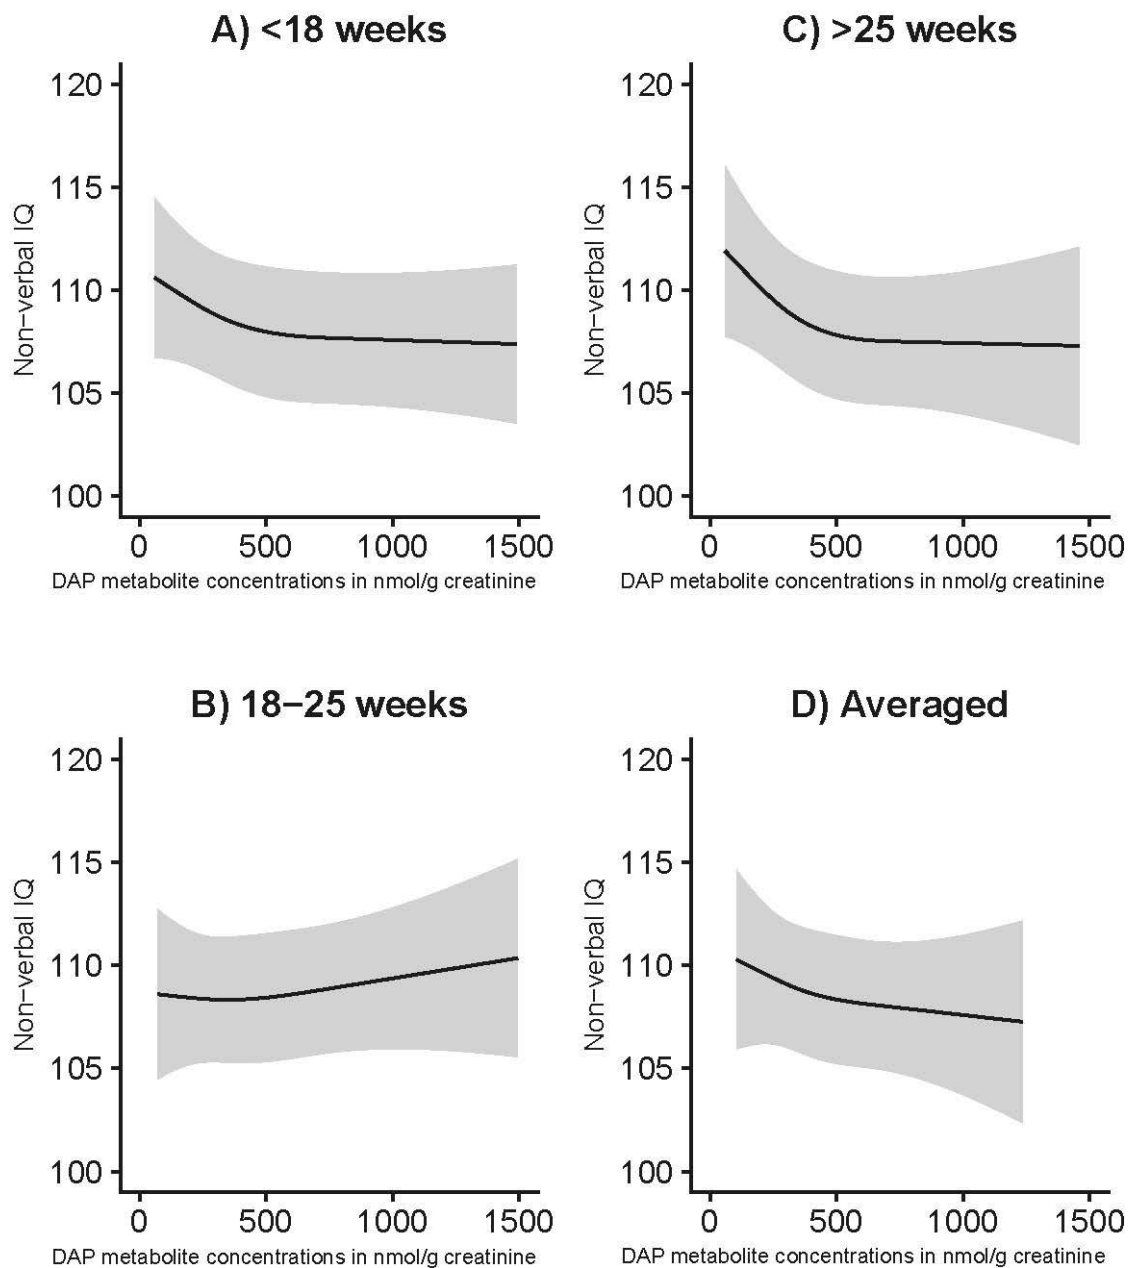



**Figure S2. Restricted cubic spline (and 95% confidence interval) of adjusted child nonverbal IQ scores and (untransformed) diethyl alkyl phosphate concentrations, by timing of pregnancy urine sampling (n=708).** Adjusted for child sex, maternal age, ethnicity (Dutch, other-western and non-western), education (low, intermediate, and high), income (low, middle, and high), marital status, maternal alcohol consumption (no alcohol consumption during pregnancy, alcohol consumption until pregnancy was known, occasional alcohol consumption during pregnancy, and frequent alcohol consumption during pregnancy), maternal non-verbal IQ, BMI categories (<18.5, 18.5-25, 25-30, and 30+), height of the mother, parity categories (0, 1, and 2+), IT-Home quartiles, and smoking categories (no smoking during pregnancy, smoked until pregnancy was known, and smoked during pregnancy).

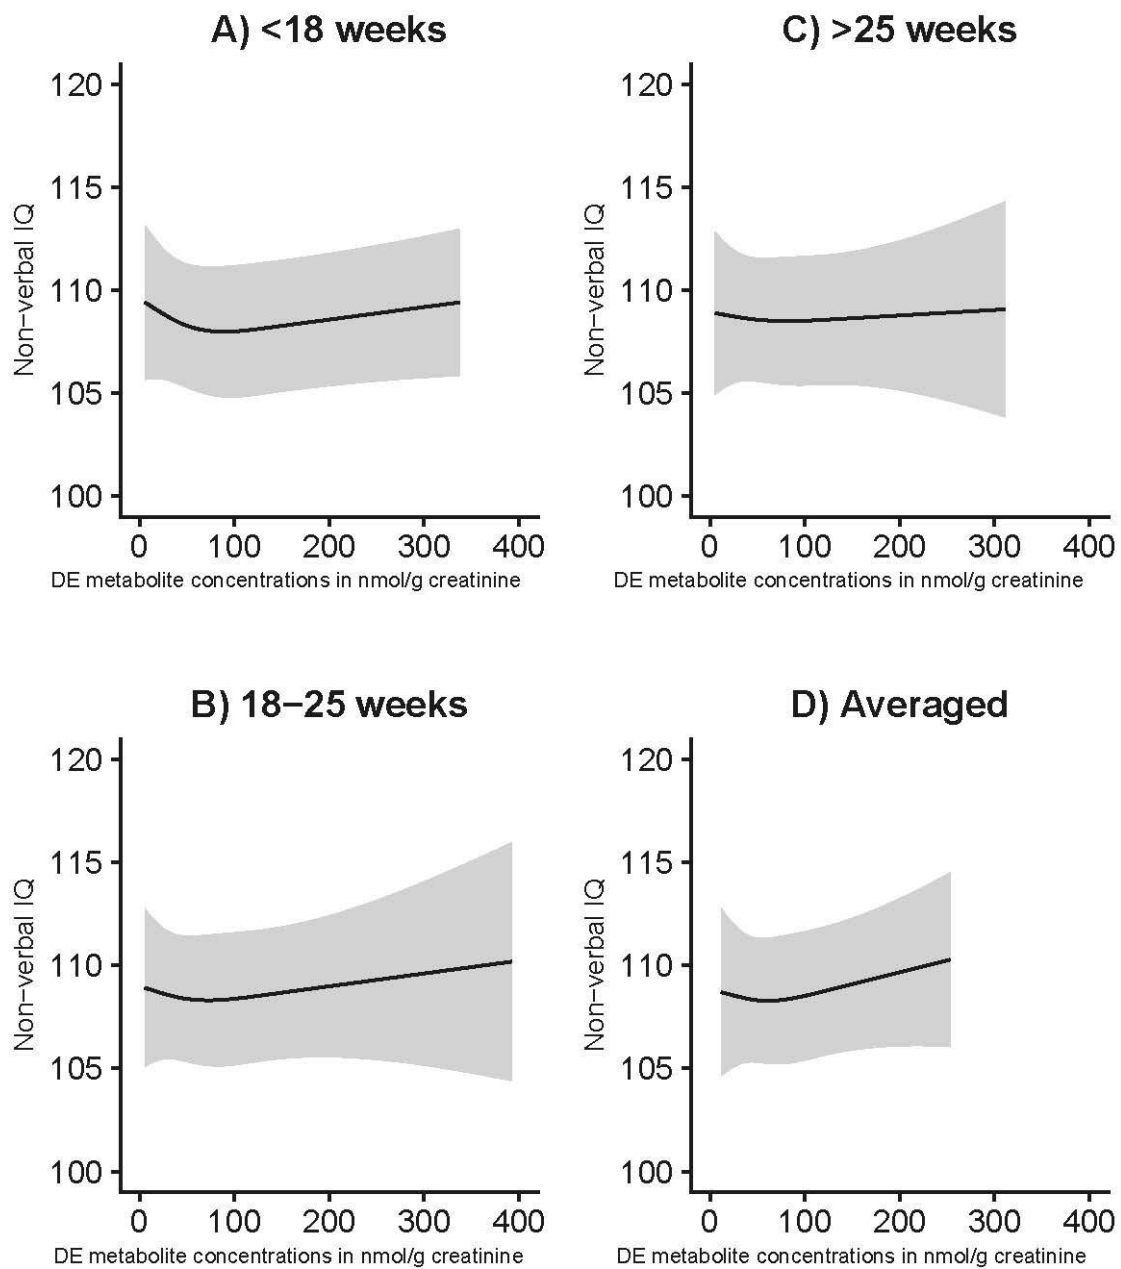

**Figure S3. Restricted cubic spline (and 95% confidence interval) of adjusted child nonverbal IQ scores and (untransformed) dimethyl alkyl phosphate concentrations, by timing of pregnancy urine sampling (n=708).** Adjusted for child sex, maternal age, ethnicity (Dutch, other-western and non-western), education (low, intermediate, and high), income (low, middle, and high), marital status, maternal alcohol consumption (no alcohol consumption during pregnancy, alcohol consumption until pregnancy was known, occasional alcohol consumption during pregnancy, and frequent alcohol consumption during pregnancy), maternal non-verbal IQ, BMI categories (<18.5, 18.5-25, 25-30, and 30+), height of the mother, parity categories (0, 1, and 2+), IT-Home quartiles, and smoking categories (no smoking during pregnancy, smoked until pregnancy was known, and smoked during pregnancy).

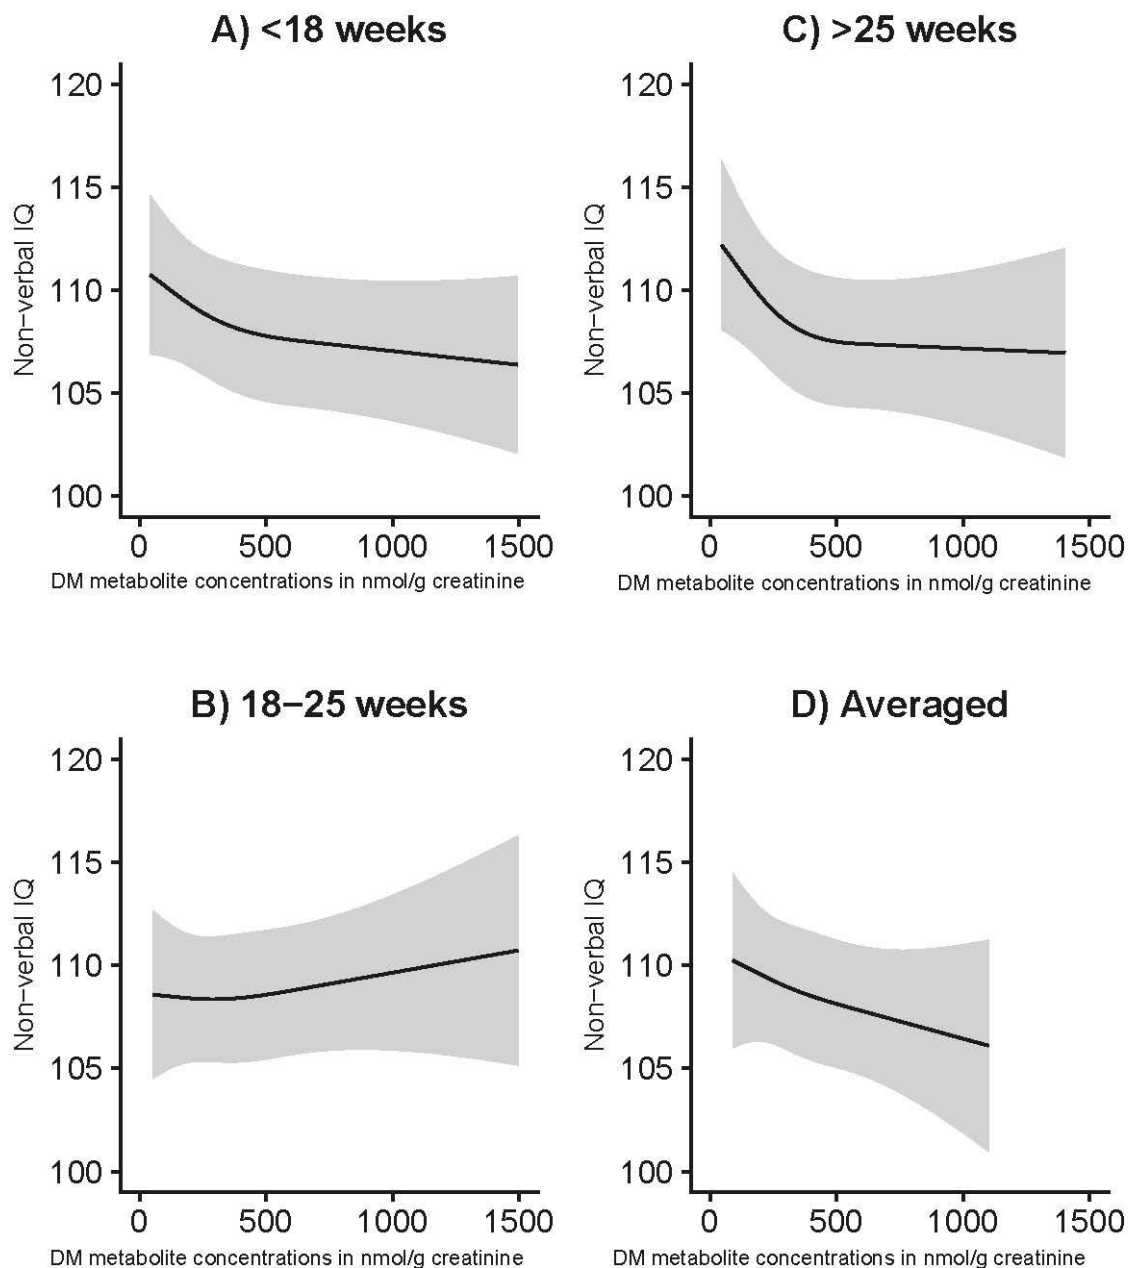

Supplement: ehp-127-017007-s001.pdf [file ehp-127-017007-s001.pdf]
